# Supplementary material for: Photophysical Study on the Rigid Pt(II) Complex [Pt(naphen)(Cl)] (Hnaphen = Naphtho[1,2-b][1,10]Phenanthroline and Derivatives
Source: MDPI journal article supplement (doi:10.3390/molecules27207022), 2022-10-18
Supplement: s1 [file s1]

## Supplementary Materials

### Photophysical Study on the Rigid Pt(II) Complex [Pt(naphen)Cl] (Hnaphen = naphtho[1,2-*b*][1,10]phenanthroline and Derivatives

Maren Krause<sup>1</sup>, Iván Maisuls<sup>2</sup>, Stefan Buss<sup>2</sup>, Cristian A. Strassert<sup>2</sup>, Andreas Winter<sup>3,4</sup>, Ulrich S. Schubert<sup>3,4</sup>, Shruti S. Nair<sup>5,6</sup>, Benjamin Dietzek-Ivansic<sup>5,6\*</sup>, Axel Klein<sup>1\*</sup>

<sup>1</sup> Universität zu Köln, Department für Chemie, Institut für Anorganische Chemie, Greinstraße 6, 50939 Köln, Germany.

<sup>2</sup> Westfälische Wilhelms-Universität Münster, Institut für Anorganische und Analytische Chemie, Corrensstr. 28/30, 48149 Münster, Germany; CeNTech, CiMIC, SoN, Heisenbergstr. 11, 48149 Münster, Germany.

<sup>3</sup> Friedrich Schiller University Jena, Laboratory of Organic and Macromolecular Chemistry (IOMC), Humboldtstr. 10, 07743 Jena, Germany.

<sup>4</sup> Friedrich Schiller University Jena, Center for Energy and Environmental Chemistry Jena (CEEC Jena), Philosophenweg 7a, 07743 Jena, Germany.

<sup>5</sup> Friedrich Schiller University Jena, Institute for Physical Chemistry (IPC), Helmholtzweg 4, 07743 Jena, Germany.

<sup>6</sup> Leibniz Institute for Photonic Technologies Jena (IPHT) Albert-Einstein-Str. 9, 07745 Jena, Germany.

#### contents:

#### Supporting Figures

**Figure S1.** 300 MHz <sup>1</sup>H NMR spectrum of 5,6,8,9-tetrahydro-naphtho[1,2-*b*][1,10]phenanthroline (Hthnaphen) in CD<sub>2</sub>Cl<sub>2</sub>.

**Figure S2.** 300 MHz <sup>1</sup>H NMR spectrum of naphtho[1,2-*b*][1,10]phenanthroline (Hnaphen) in CDCl<sub>3</sub>.

**Figure S3.** 300 MHz <sup>1</sup>H NMR spectra of Hthnaphen, Hdhnaphen und Hnaphen in CDCl<sub>3</sub>.

**Figure S4.** 600 MHz <sup>1</sup>H NMR spectrum of [Pt(naphen)Cl] in CD<sub>2</sub>Cl<sub>2</sub>.

**Figure S5.** 600 MHz <sup>1</sup>H NMR spectrum of [Pt(thnaphen)Cl] in CD<sub>2</sub>Cl<sub>2</sub>.

**Figure S6.** 600 MHz <sup>1</sup>H/<sup>1</sup>H-COSY NMR spectrum of [Pt(thnaphen)Cl] in CD<sub>2</sub>Cl<sub>2</sub>.

**Figure S7.** 300 MHz <sup>1</sup>H NMR spectrum of [Pt(naphen)(C≡CPh)] in CD<sub>2</sub>Cl<sub>2</sub>.

**Figure S8.** 300 MHz <sup>1</sup>H NMR spectrum of [Pt(thnaphen)(C≡CPh)] in CD<sub>2</sub>Cl<sub>2</sub>.

**Figure S9.** Excerpt of the EI-MS (+) of [Pt(naphen)Cl] and simulation.

**Figure S10.** Excerpt from the EI-MS(+) (70 eV) of [Pt(thnaphen)Cl].

**Figure S11.** Simulated MS of [Pt(thnaphen)Cl]. [Pt(naphen)]<sup>+</sup>, [Pt(dhnaphen)]<sup>+</sup>, [Pt(thnaphen)]<sup>+</sup>, and [Pt(thnaphen)Cl]<sup>+</sup>.

**Figure S12.** Excerpt of the ESI-MS (+) of [Pt(thnaphen)Cl] in CH<sub>3</sub>CN with simulation.

**Figure S13.** EI-MS (+) of [Pt(naphen)(C≡CPh)] with excerpt with simulation of [M]<sup>+</sup> at 575 m/z.

**Figure S14.** Excerpt of the EI-MS (+) of [Pt(thnaphen)(C≡CPh)] with simulation.

**Figure S15.** Cyclic voltammograms of Hthnaphen and Hnaphen in 0.1 M *n*-Bu<sub>4</sub>NPF<sub>6</sub>/THF solution.

**Figure S16.** Cyclic voltammograms of [Pt(thnaphen)Cl] in 0.1 M *n*-Bu<sub>4</sub>NPF<sub>6</sub>/THF and /CH<sub>2</sub>Cl<sub>2</sub>.

**Figure S17.** Cyclic voltammograms of [Pt(thnaphen)(C≡CPh)] in 0.1 M *n*-Bu<sub>4</sub>NPF<sub>6</sub>/THF and /CH<sub>2</sub>Cl<sub>2</sub>.

**Figure S18.** Cyclic voltammograms of [Pt(naphen)Cl] in 0.1 M *n*-Bu<sub>4</sub>NPF<sub>6</sub>/THF and /CH<sub>2</sub>Cl<sub>2</sub>.

**Figure S19.** Cyclic voltammograms of [Pt(bdq)Cl] in 0.1 M *n*-Bu<sub>4</sub>NPF<sub>6</sub>/THF and /CH<sub>2</sub>Cl<sub>2</sub>.

**Figure S20.** DFT-calculated contributions to the highest occupied molecular orbital (HOMO) and lowest unoccupied molecular orbital (LUMO) of [Pt(naphen)Cl] and [Pt(bdq)Cl] on B3LYP level.

**Figure S21.** UV-vis absorption spectra of Hthnaphen and Hnaphen in CH<sub>2</sub>Cl<sub>2</sub>.

**Figure S22.** UV-vis absorption spectra of [Pt(naphen)(C≡CPh)] in CH<sub>2</sub>Cl<sub>2</sub>.

**Figure S23.** UV-vis absorption spectra of [Pt(thnaphen)(C≡CPh)] in CH<sub>2</sub>Cl<sub>2</sub>.

**Figure S24.** Normalised emission spectra of [Pt(bdq)Cl] in a CH<sub>2</sub>Cl<sub>2</sub> solution at RT and in a frozen glassy matrix of CH<sub>2</sub>Cl<sub>2</sub>:MeOH 1:1 at 77 K.  $\lambda_{\text{ex}} = 350$  nm.

**Figure S25.** Normalised emission spectra of [Pt(naphen)Cl] in a CH<sub>2</sub>Cl<sub>2</sub> solution at RT and in a frozen glassy matrix of CH<sub>2</sub>Cl<sub>2</sub>:MeOH 1:1 at 77 K.  $\lambda_{\text{ex}} = 350$  nm.

**Figure S26.** Normalised emission spectra of [Pt(naphen)C≡CPh] in a CH<sub>2</sub>Cl<sub>2</sub> solution at RT and in a frozen glassy matrix of CH<sub>2</sub>Cl<sub>2</sub>:MeOH 1:1 at 77 K.  $\lambda_{\text{ex}} = 350$  nm.

**Figure S27.** Normalised emission spectra of [Pt(thnaphen)Cl] in a CH<sub>2</sub>Cl<sub>2</sub> solution at RT and in a frozen glassy matrix of CH<sub>2</sub>Cl<sub>2</sub>:MeOH 1:1 at 77 K.  $\lambda_{\text{ex}} = 350$  nm.

**Figure S28.** Normalised emission spectra of [Pt(thnaphen)C≡CPh] in a CH<sub>2</sub>Cl<sub>2</sub> solution at RT and in a frozen glassy matrix of CH<sub>2</sub>Cl<sub>2</sub>:MeOH 1:1 at 77 K.  $\lambda_{\text{ex}} = 350$  nm.

**Figure S29.** Normalised emission spectra of [Pt(bdq)Cl], [Pt(naphen)Cl], and [Pt(dba)(DMSO)] in CH<sub>2</sub>Cl<sub>2</sub> (298 K) ( $\lambda_{\text{ex}} = 350$  nm).

**Figure S30.** Time-resolved photoluminescence decay of [Pt(bdq)Cl] in an air-equilibrated CH<sub>2</sub>Cl<sub>2</sub> solution at 298 K ( $c = 10^{-5}$  M), including the residuals ( $\lambda_{\text{ex}} = 376$  nm,  $\lambda_{\text{em}} = 590$  nm).

**Figure S31.** Time-resolved photoluminescence decay of [Pt(bdq)Cl] in an Ar-purged CH<sub>2</sub>Cl<sub>2</sub> solution at 298 K ( $c = 10^{-5}$  M), including the residuals ( $\lambda_{\text{ex}} = 376$  nm,  $\lambda_{\text{em}} = 590$  nm).

**Figure S32.** Time-resolved photoluminescence decay of [Pt(bdq)Cl] in a frozen CH<sub>2</sub>Cl<sub>2</sub>:MeOH 1:1 glassy matrix at 77 ( $c = 10^{-5}$  M), including the residuals ( $\lambda_{\text{ex}} = 376$  nm,  $\lambda_{\text{em}} = 590$  nm).

**Figure S33.** Time-resolved photoluminescence decay of [Pt(naphen)Cl] in an air-equilibrated CH<sub>2</sub>Cl<sub>2</sub> solution at 298 K ( $c = 10^{-5}$  M), including the residuals ( $\lambda_{\text{ex}} = 376$  nm,  $\lambda_{\text{em}} = 640$  nm).

**Figure S34.** Time-resolved photoluminescence decay of [Pt(naphen)Cl] in an Ar-purged CH<sub>2</sub>Cl<sub>2</sub> solution at 298 K ( $c = 10^{-5}$  M), including the residuals ( $\lambda_{\text{ex}} = 376$  nm,  $\lambda_{\text{em}} = 640$  nm).

**Figure S35.** Time-resolved photoluminescence decay of [Pt(naphen)Cl] in a frozen CH<sub>2</sub>Cl<sub>2</sub>:MeOH 1:1 glassy matrix at 77 ( $c = 10^{-5}$  M), including the residuals ( $\lambda_{\text{ex}} = 376$  nm,  $\lambda_{\text{em}} = 620$  nm).

**Figure S36.** Time-resolved photoluminescence decay of [Pt(naphen)C≡CPh] in an air-equilibrated CH<sub>2</sub>Cl<sub>2</sub> solution at 298 K ( $c = 10^{-5}$  M), including the residuals ( $\lambda_{\text{ex}} = 376$  nm,  $\lambda_{\text{em}} = 650$  nm).

**Figure S37.** Time-resolved photoluminescence decay of [Pt(naphen)C≡CPh] in an Ar-purged CH<sub>2</sub>Cl<sub>2</sub> solution at 298 K ( $c = 10^{-5}$  M), including the residuals ( $\lambda_{\text{ex}} = 376$  nm,  $\lambda_{\text{em}} = 650$  nm).

**Figure S38.** Time-resolved photoluminescence decay of [Pt(naphen)C≡CPh] in a frozen CH<sub>2</sub>Cl<sub>2</sub>:MeOH 1:1 glassy matrix at 77 ( $c = 10^{-5}$  M), including the residuals ( $\lambda_{\text{ex}} = 376$  nm,  $\lambda_{\text{em}} = 610$  nm).

**Figure S39.** Time-resolved photoluminescence decay of [Pt(thnaphen)Cl] in an air-equilibrated CH<sub>2</sub>Cl<sub>2</sub> solution at 298 K ( $c = 10^{-5}$  M), including the residuals ( $\lambda_{\text{ex}} = 376$  nm,  $\lambda_{\text{em}} = 590$  nm).

**Figure S40.** Time-resolved photoluminescence decay of [Pt(naphen)C≡CPh] in an Ar-purged CH<sub>2</sub>Cl<sub>2</sub> solution at 298 K ( $c = 10^{-5}$  M), including the residuals ( $\lambda_{\text{ex}} = 376$  nm,  $\lambda_{\text{em}} = 590$  nm).

**Figure S41.** Time-resolved photoluminescence decay of [Pt(thnaphen)Cl] in a frozen CH<sub>2</sub>Cl<sub>2</sub>:MeOH 1:1 glassy matrix at 77 ( $c = 10^{-5}$  M), including the residuals ( $\lambda_{\text{ex}} = 376$  nm,  $\lambda_{\text{em}} = 540$  nm).

**Figure S42.** Time-resolved photoluminescence decay of [Pt(thnaphen)C≡CPh] in an air-equilibrated CH<sub>2</sub>Cl<sub>2</sub> solution at 298 K ( $c = 10^{-5}$  M), including the residuals ( $\lambda_{\text{ex}} = 376$  nm,  $\lambda_{\text{em}} = 600$  nm).

**Figure S43.** Time-resolved photoluminescence decay of [Pt(naphen)C≡CPh] in an Ar-purged CH<sub>2</sub>Cl<sub>2</sub> solution at 298 K ( $c = 10^{-5}$  M), including the residuals ( $\lambda_{\text{ex}} = 376$  nm,  $\lambda_{\text{em}} = 600$  nm).

**Figure S44.** Time-resolved photoluminescence decay of [Pt(thnaphen)C≡Ph] in a frozen CH<sub>2</sub>Cl<sub>2</sub>:MeOH 1:1 glassy matrix at 77 ( $c = 10^{-5}$  M), including the residuals ( $\lambda_{\text{ex}} = 376$  nm,  $\lambda_{\text{em}} = 550$  nm).

**Figure S45.** Left: Nanosecond time-resolved emission spectra superimposed to the inverted steady-state spectrum in black (A) and transient absorption spectra (B) of [Pt(naphen)Cl] in CH<sub>2</sub>Cl<sub>2</sub> at selected time points. Black/grey line refers to superimposed inverted steady state emission/absorption spectra respectively. Right: Decay fits at selected wavelengths. Please note: The figure presents data, which were recorded in the presence of trace amount of ligand. The residual free ligand in the sample leads to the short-lived emission band centered at 410 nm.

## Supporting Tables

**Table S1.** UV-vis absorptions of the ligands and [Pt(L)X] complexes.

## Supporting Figures

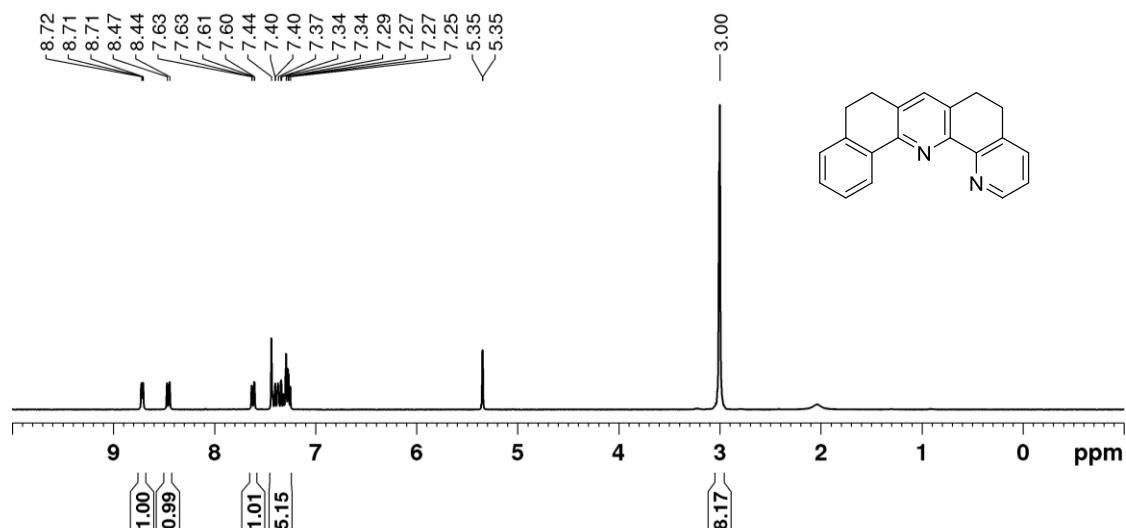

**Figure S1.** 300 MHz  $^1\text{H}$  NMR spectrum of 5,6,8,9-tetrahydro-naphtho[1,2-*b*][1,10]phenanthroline (Hthnaphen) in  $\text{CD}_2\text{Cl}_2$ .

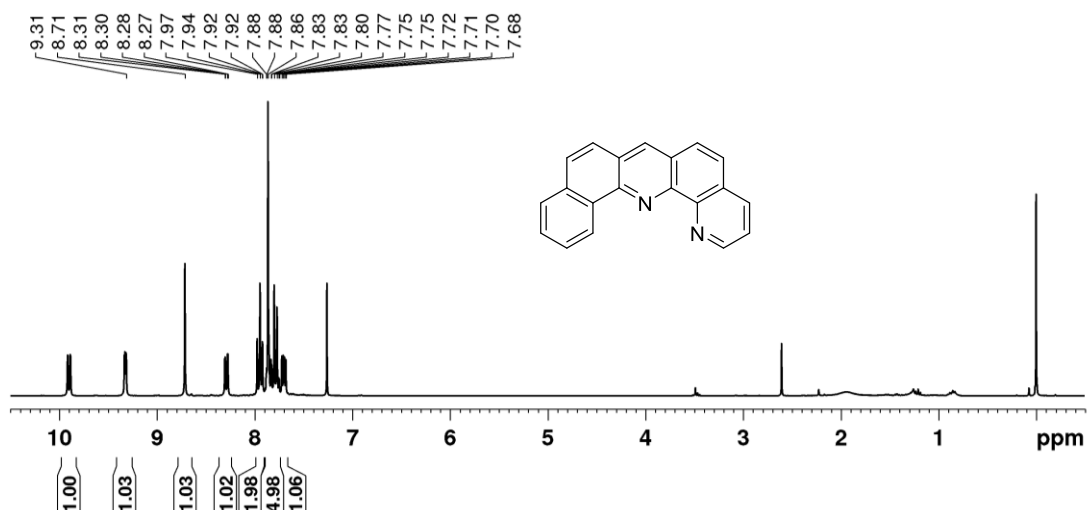

**Figure S2.** 300 MHz  $^1\text{H}$  NMR spectrum of naphtho[1,2-*b*][1,10]phenanthroline (Hnaphen) in  $\text{CDCl}_3$ .

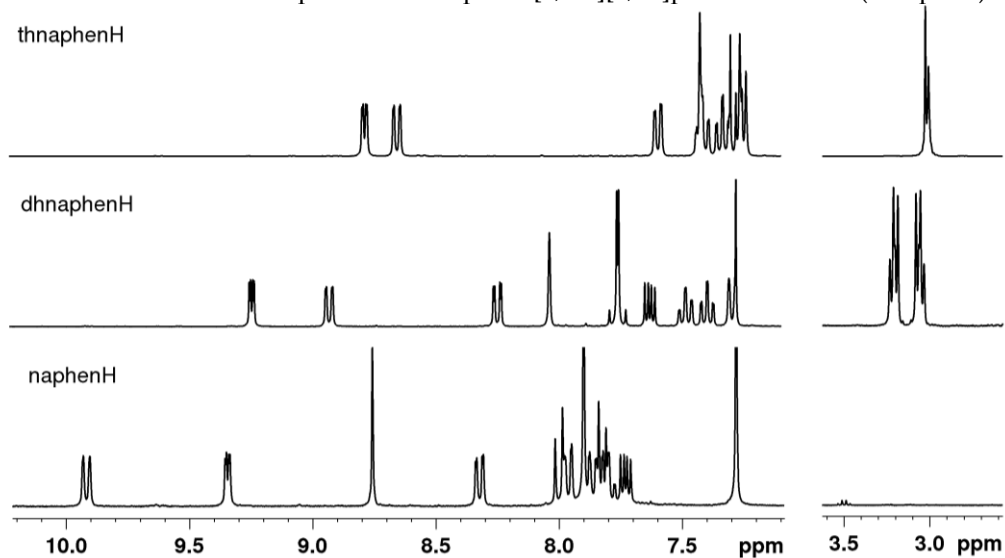

**Figure S3.** 300 MHz  $^1\text{H}$  NMR spectra of Hthnaphen, Hdhnaphen und Hnaphen in  $\text{CDCl}_3$ .

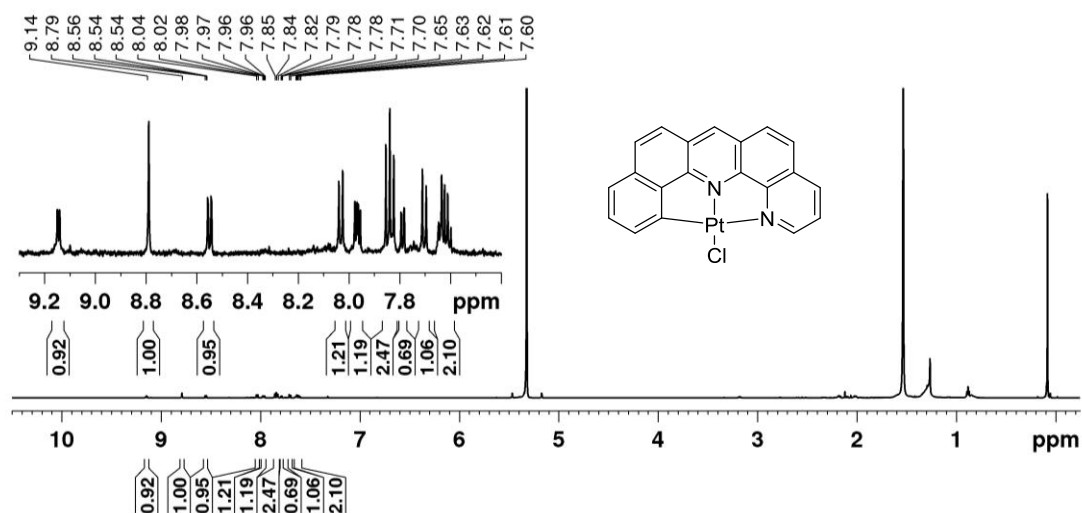

Figure S4. 600 MHz  $^1\text{H}$  NMR spectrum of [Pt(naphen)Cl] in  $\text{CD}_2\text{Cl}_2$ .

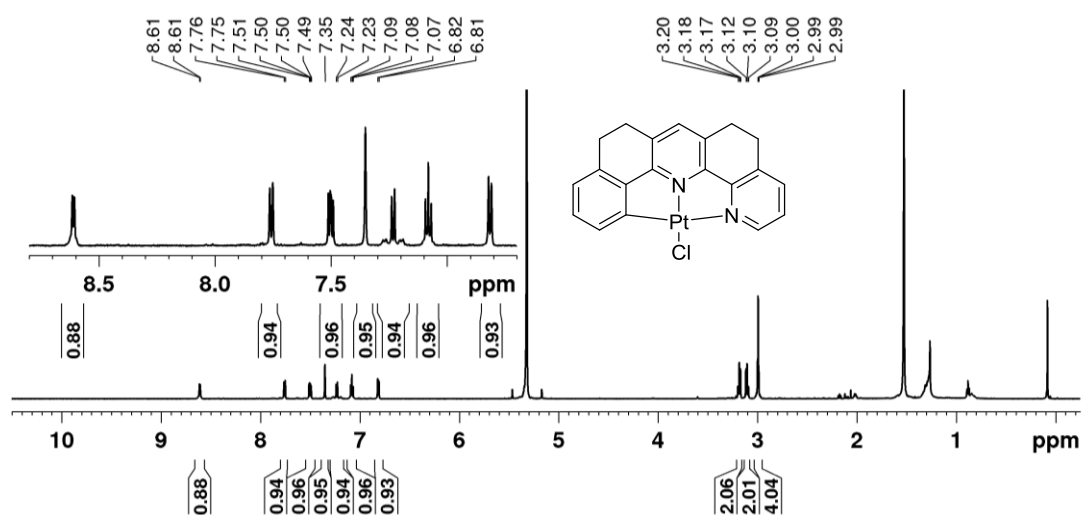

Figure S5. 600 MHz  $^1\text{H}$  NMR spectrum of [Pt(thnaphen)Cl] in  $\text{CD}_2\text{Cl}_2$ .

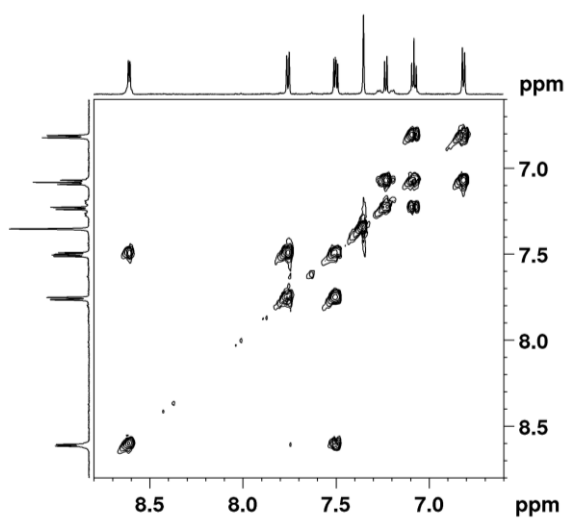

Figure S6. 600 MHz  $^1\text{H}/^1\text{H}$ -COSY NMR spectrum of [Pt(thnaphen)Cl] in  $\text{CD}_2\text{Cl}_2$ .

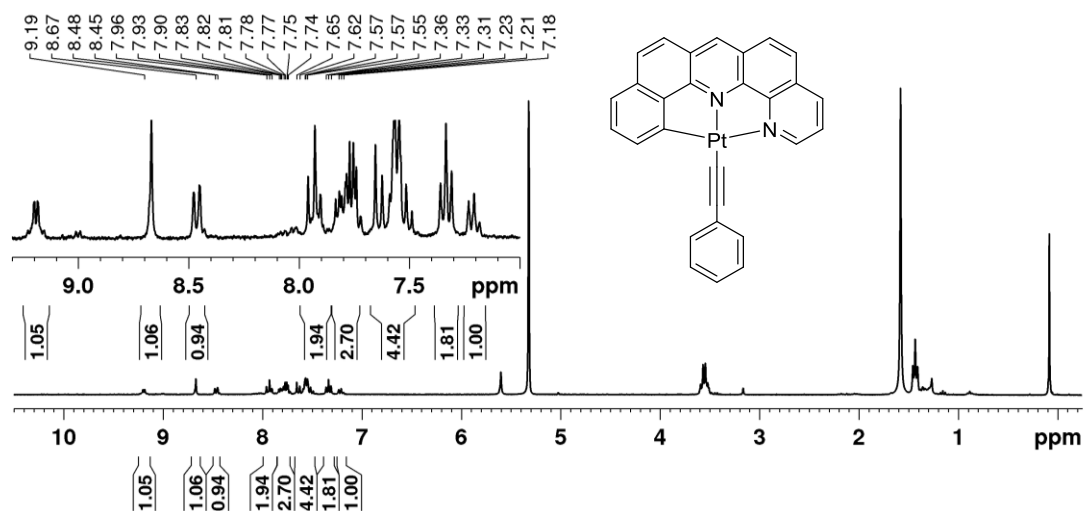

Figure S7. 300 MHz  $^1\text{H}$  NMR spectrum of  $[\text{Pt}(\text{naphen})(\text{C}\equiv\text{CPh})]$  in  $\text{CD}_2\text{Cl}_2$ .

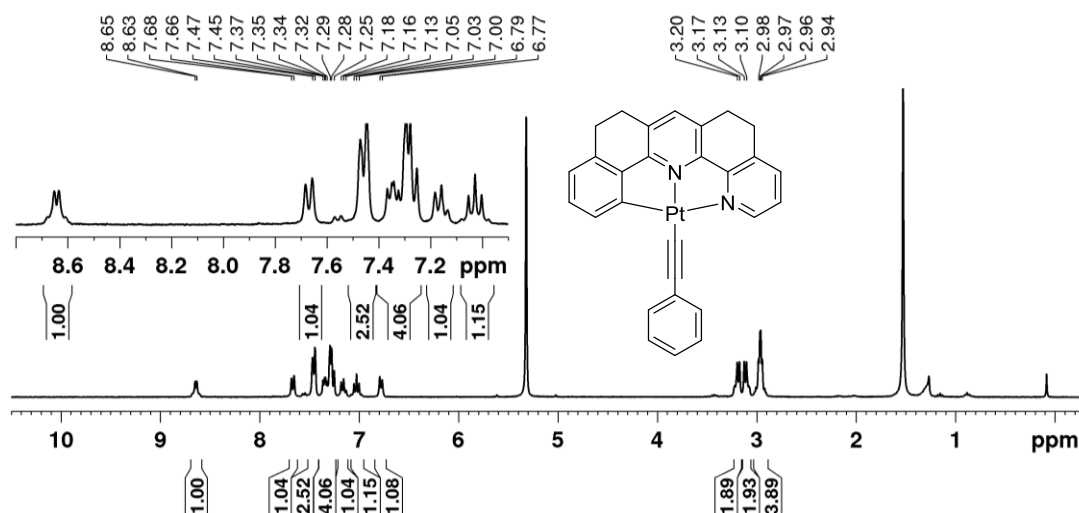

Figure S8. 300 MHz  $^1\text{H}$  NMR spectrum of  $[\text{Pt}(\text{thnaphen})(\text{C}\equiv\text{CPh})]$  in  $\text{CD}_2\text{Cl}_2$ .

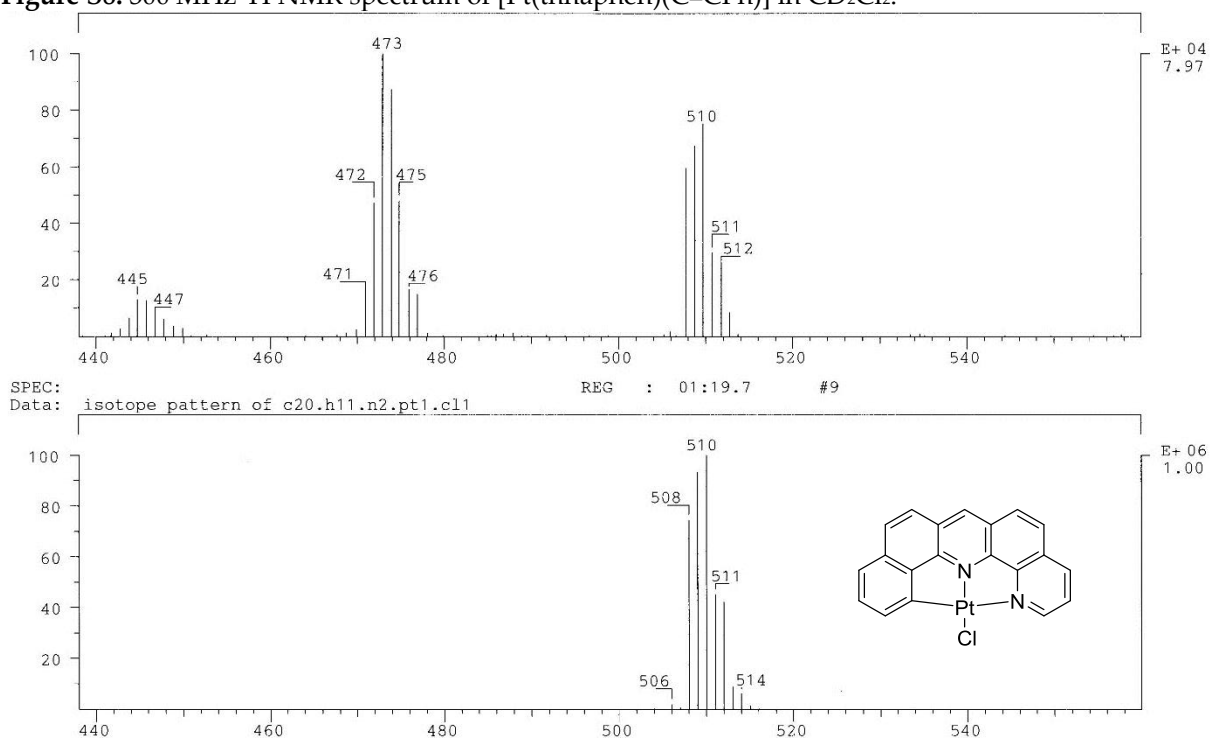

Figure S9. Excerpt of the EI-MS (+) of  $[\text{Pt}(\text{naphen})\text{Cl}]$  (top) with simulation (bottom).

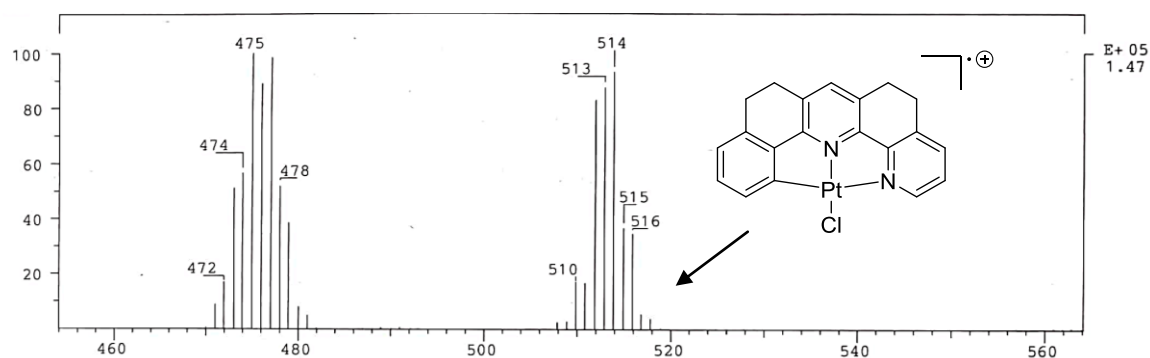

**Figure S10.** Excerpt from the EI-MS(+) (70 eV) of [Pt(thnaphen)Cl].

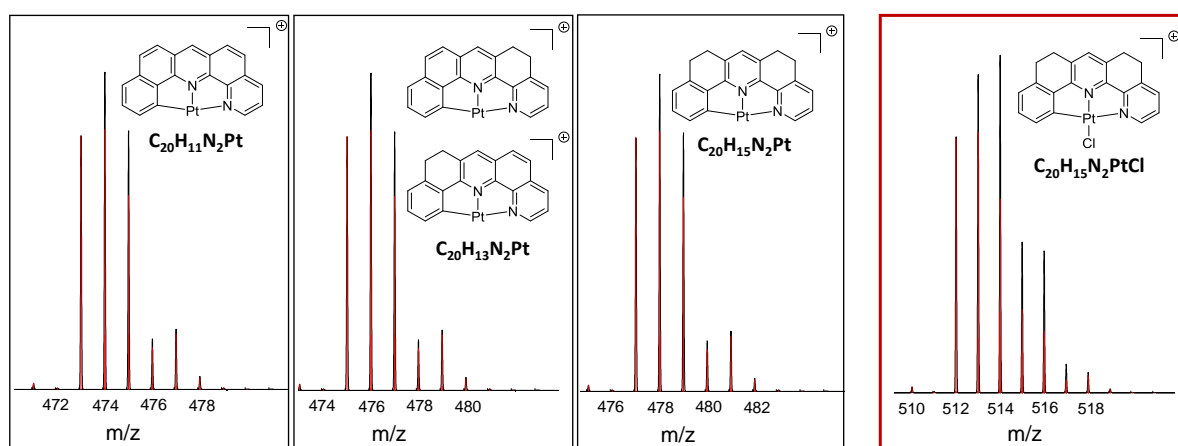

**Figure S11.** Simulated MS of [Pt(thnaphen)Cl]<sup>+</sup>, [Pt(naphen)]<sup>+</sup>, [Pt(dhnaphen)]<sup>+</sup>, [Pt(thnaphen)]<sup>+</sup>, and [Pt(thnaphen)Cl]<sup>+</sup>.

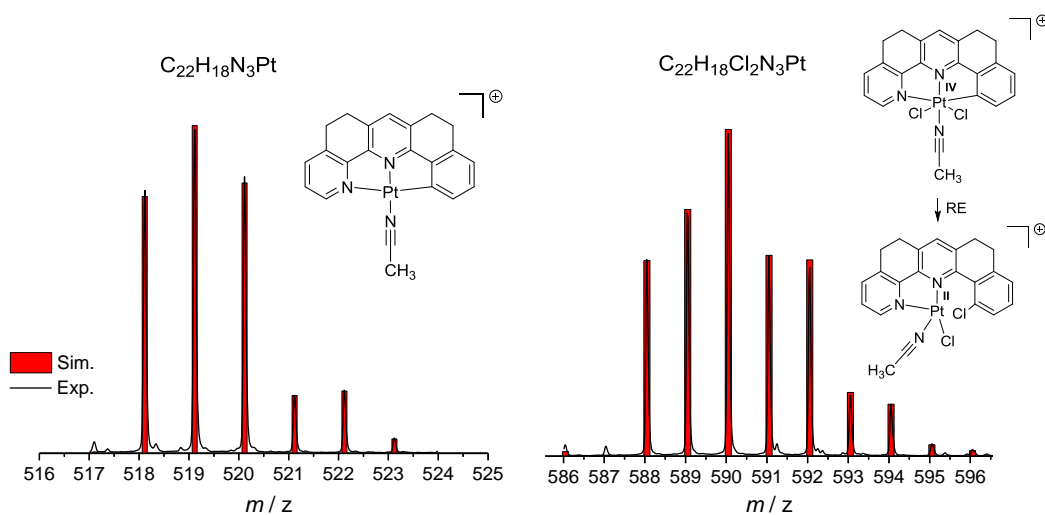

**Figure S12.** Excerpt of the ESI-MS (+) of [Pt(thnaphen)Cl] in CH<sub>3</sub>CN with simulation (in red).

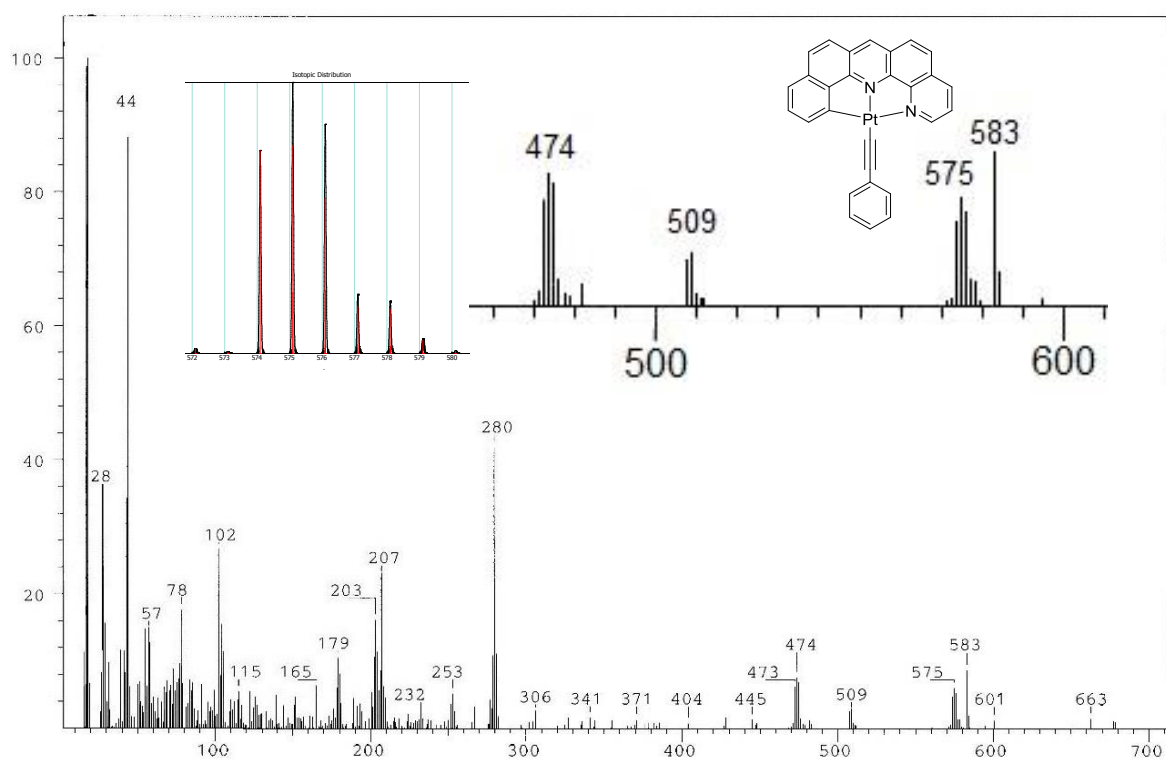

**Figure S13.** EI-MS (+) of [Pt(naphen)(C≡CPh)] with excerpt with simulation of [M]<sup>+</sup> at 575 m/z.

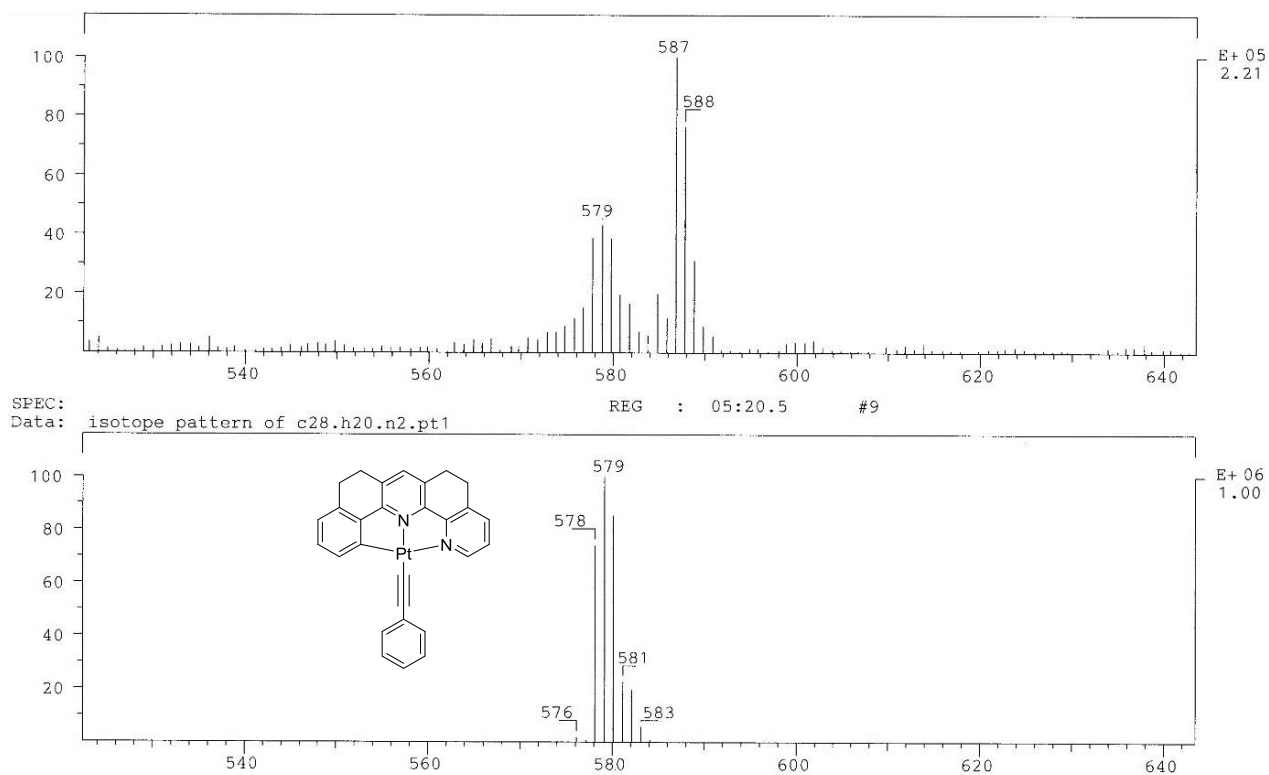

**Figure S14.** Excerpt of the EI-MS (+) of [Pt(thnaphen)(C≡CPh)] (top) with simulation (bottom).

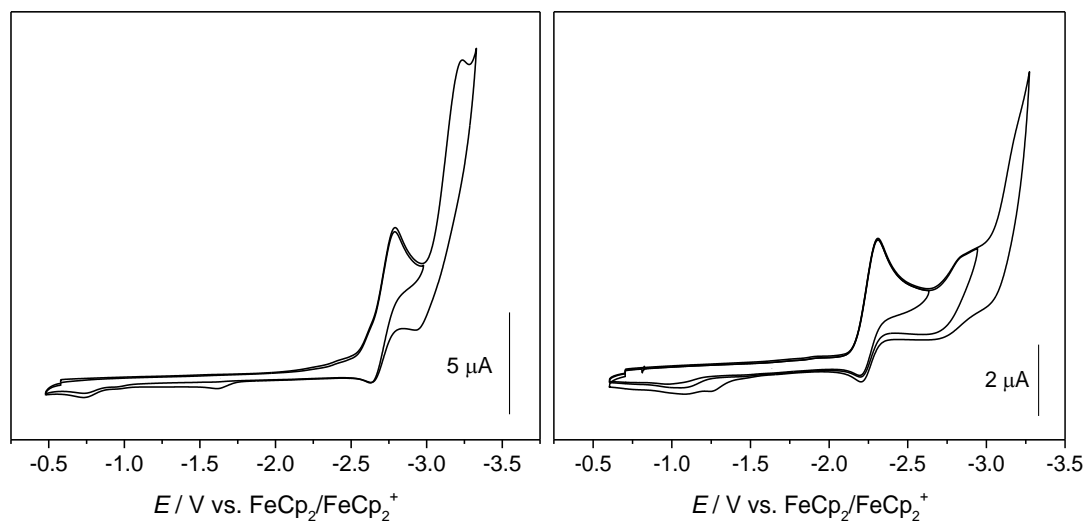

**Figure S15.** Cyclic voltammograms of Hthnaphen (left) and Hnaphen (right) in 0.1 M *n*-Bu<sub>4</sub>NPF<sub>6</sub>/THF solution.

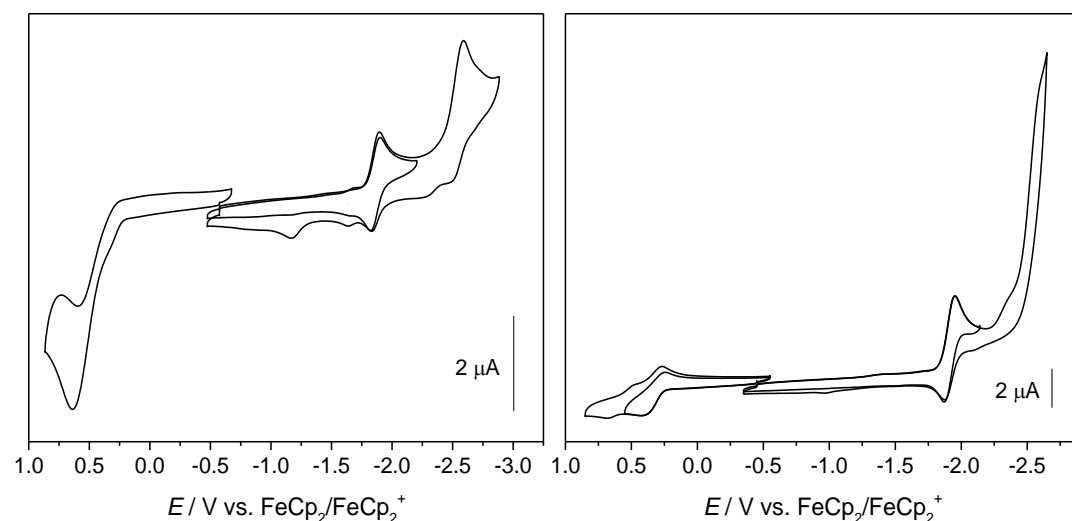

**Figure S16.** Cyclic voltammograms of [Pt(thnaphen)Cl] in 0.1 M *n*-Bu<sub>4</sub>NPF<sub>6</sub>/THF (left) and in 0.1 M *n*-Bu<sub>4</sub>NPF<sub>6</sub>/CH<sub>2</sub>Cl<sub>2</sub> (right).

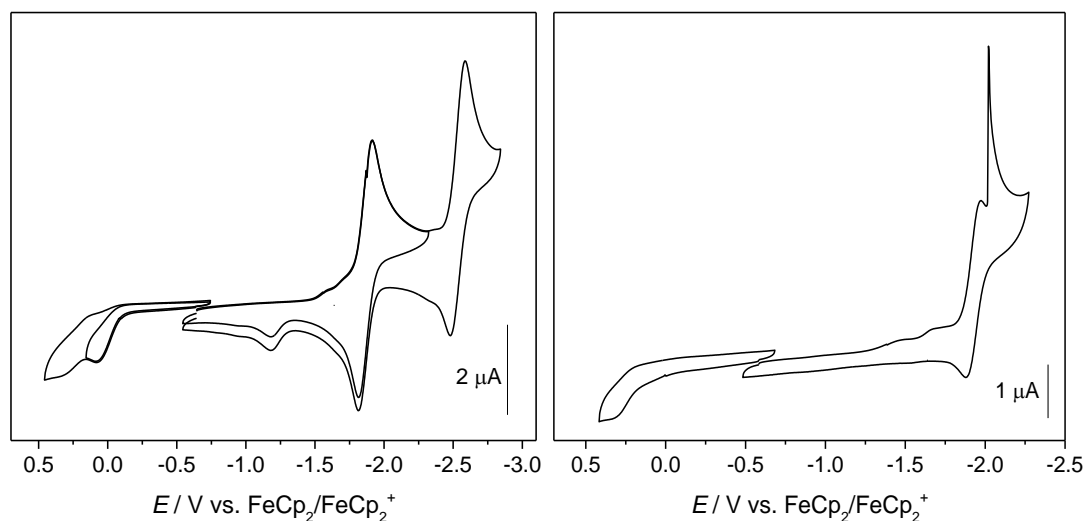

**Figure S17.** Cyclic voltammograms of [Pt(thnaphen)(C≡CPh)] in 0.1 M *n*-Bu<sub>4</sub>NPF<sub>6</sub>/THF (left) and in 0.1 M *n*-Bu<sub>4</sub>NPF<sub>6</sub>/CH<sub>2</sub>Cl<sub>2</sub> (right).



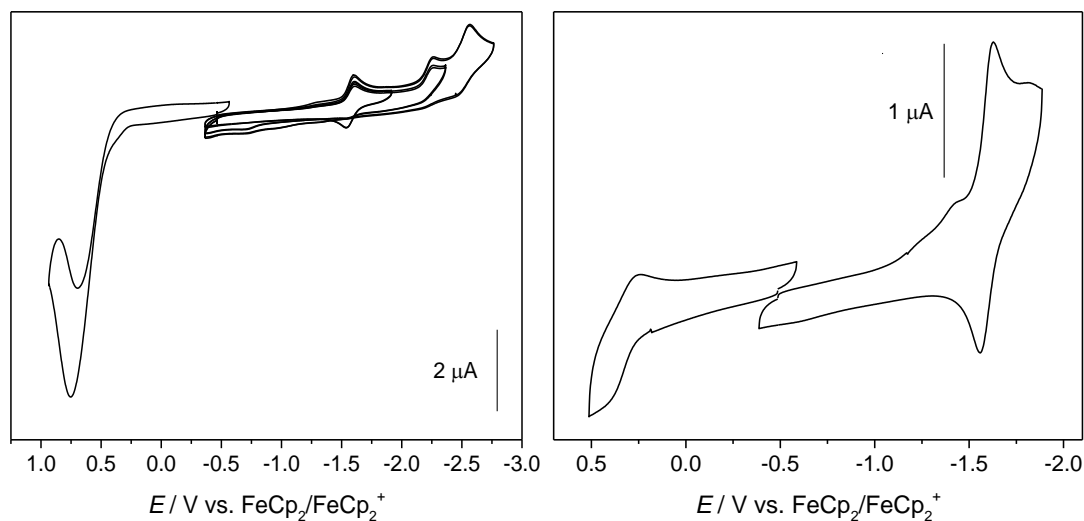

**Figure S18.** Cyclic voltammograms of [Pt(naphen)Cl] in 0.1 M *n*-Bu<sub>4</sub>NPF<sub>6</sub>/THF (left) and in 0.1 M *n*-Bu<sub>4</sub>NPF<sub>6</sub>/CH<sub>2</sub>Cl<sub>2</sub> (right).

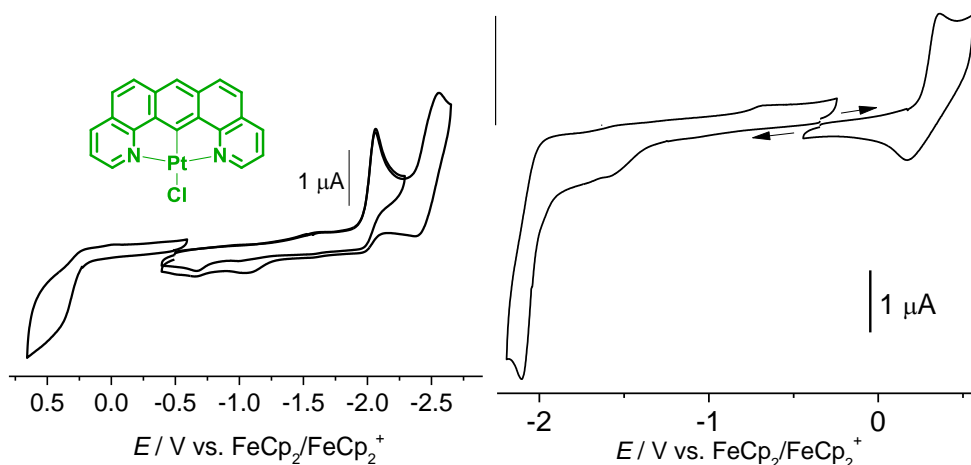

**Figure S19.** Cyclic voltammograms of [Pt(bdq)Cl] in 0.1 M *n*-Bu<sub>4</sub>NPF<sub>6</sub>/THF (left) and /CH<sub>2</sub>Cl<sub>2</sub> (right).

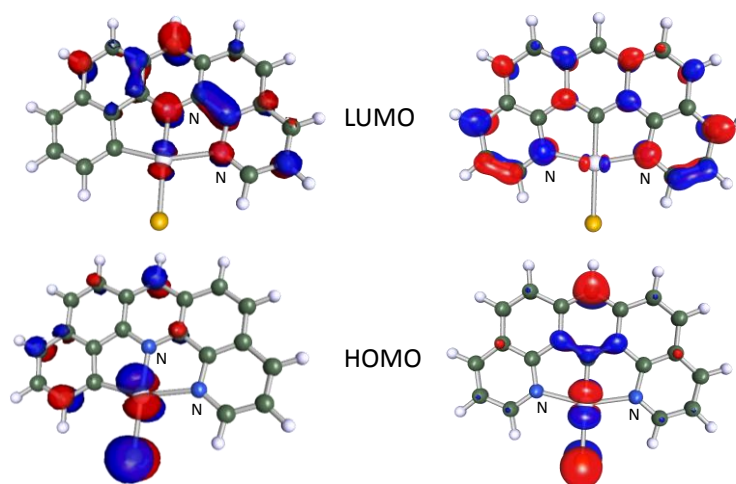

**Figure S20.** DFT-calculated contributions to the highest occupied molecular orbital (HOMO) and lowest unoccupied molecular orbital (LUMO) of [Pt(naphen)Cl] (left) and [Pt(bdq)Cl] (right) on B3LYP level using the basis sets def2-TZV(P) for C, H, N, S and LAN-L2DZ für Pt (ECP: Hay/Wadt (n=1)). Isosurface: 0.05.

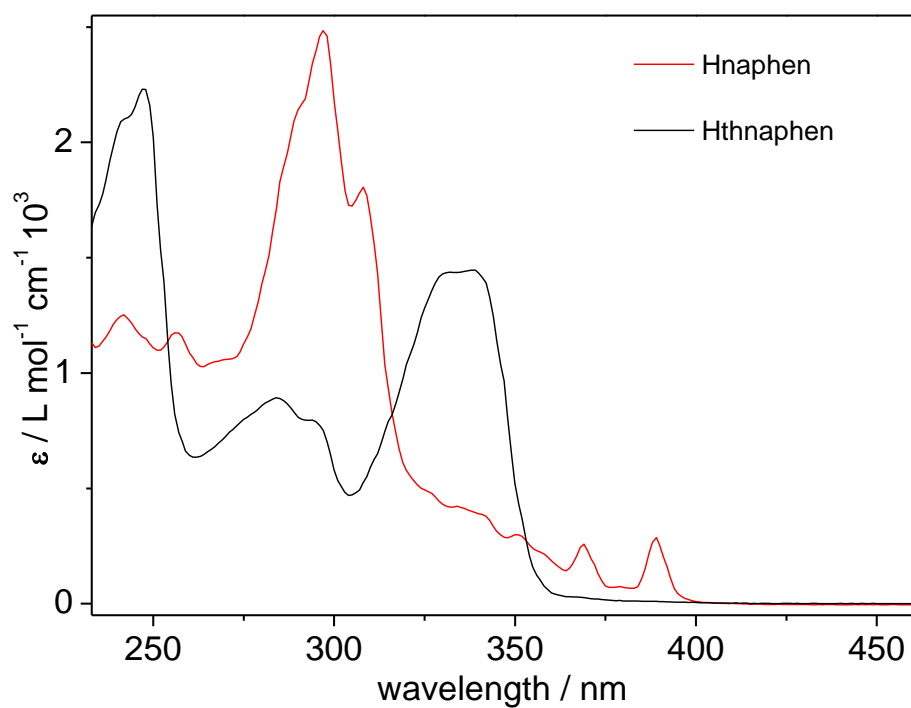

**Figure S21.** UV-vis absorption spectra of Hthnaphen (black) and Hnaphen (red) in  $\text{CH}_2\text{Cl}_2$  (298 K).

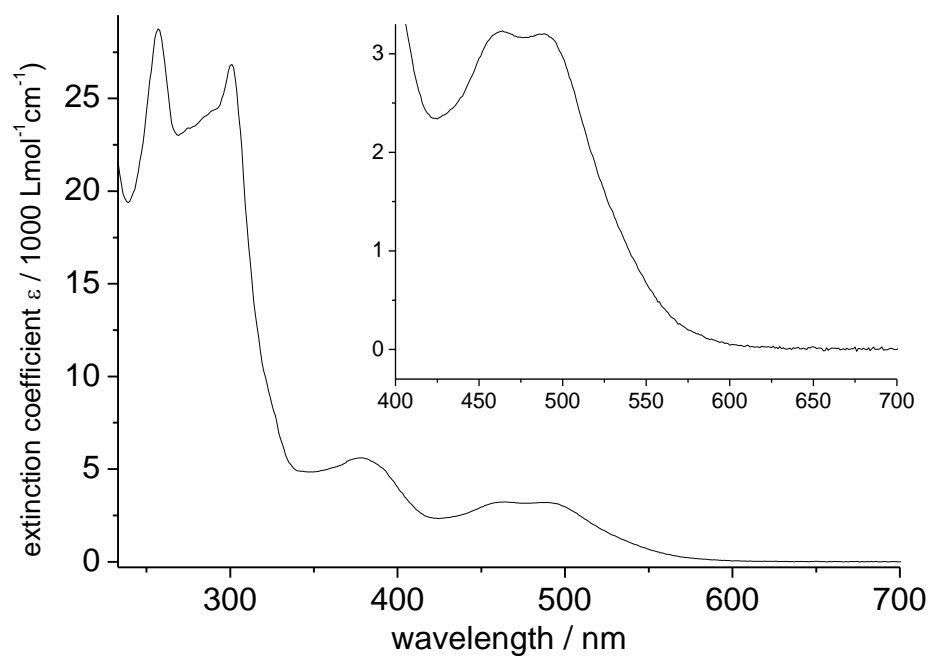

**Figure S22.** UV-vis absorption spectra of  $[\text{Pt}(\text{naphen})(\text{C}\equiv\text{CPh})]$  in  $\text{CH}_2\text{Cl}_2$  (298 K). Y-Achse: Molar absorption coefficient (oder nur epsilon, wie Fig. S21)

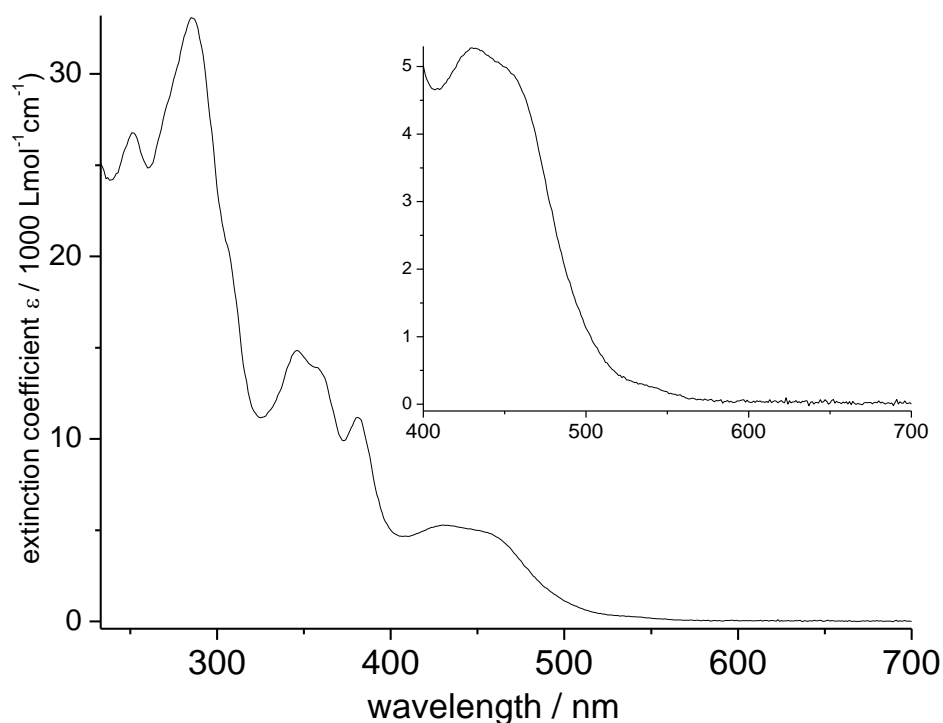

**Figure S23.** UV-vis absorption spectra of  $[\text{Pt}(\text{thnaph})(\text{C}\equiv\text{CPh})]$  in  $\text{CH}_2\text{Cl}_2$  (298 K). Y-Achse: wie Fig. S21

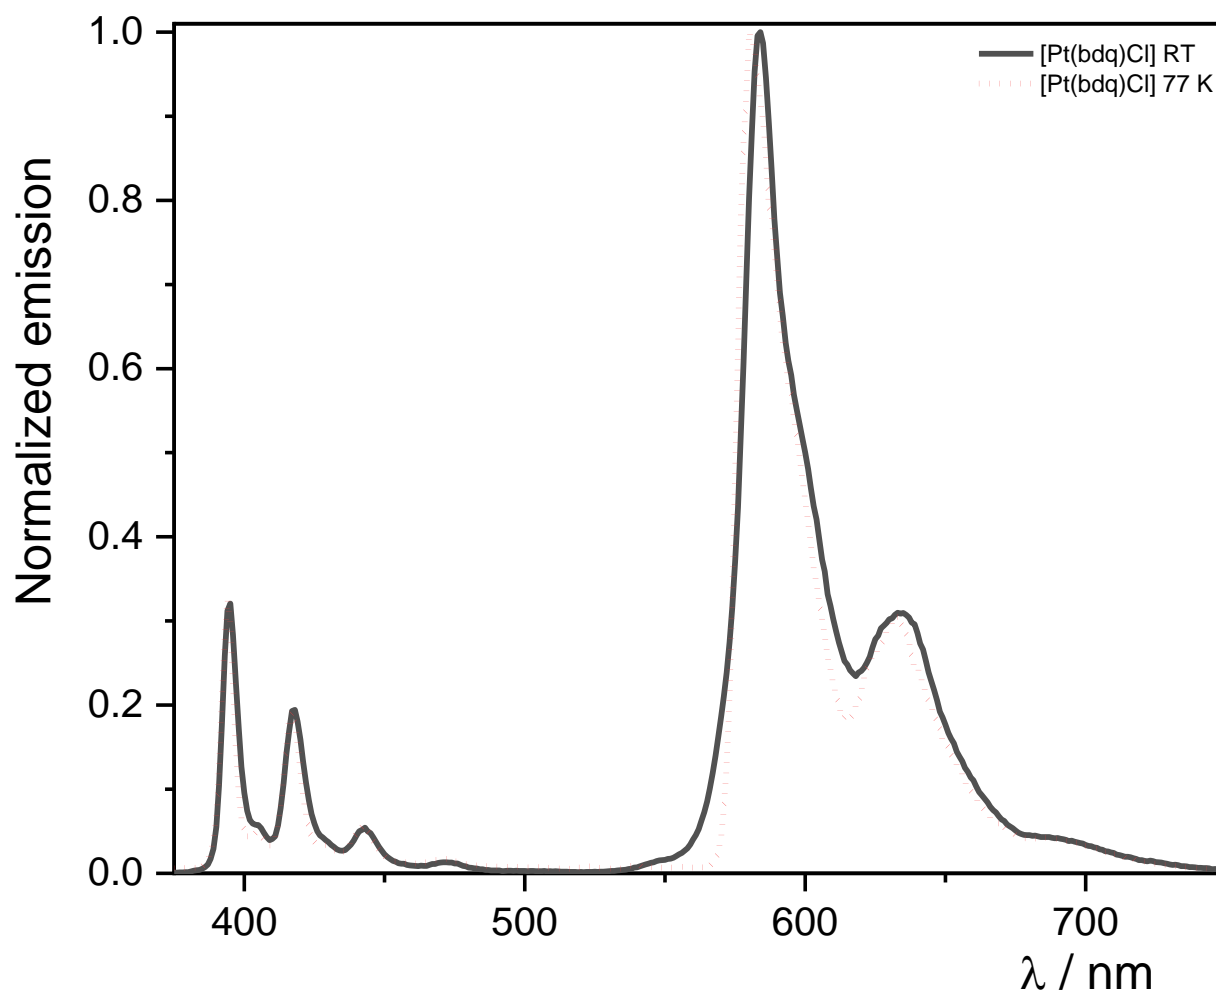

**Figure S24.** Normalised emission spectra of  $[\text{Pt}(\text{bdq})\text{Cl}]$  in a  $\text{CH}_2\text{Cl}_2$  solution at RT (black solid line) and in a frozen glassy matrix of  $\text{CH}_2\text{Cl}_2:\text{MeOH}$  1:1 at 77 K (red dotted line).  $\lambda_{\text{ex}} = 350$  nm. The emission at around 400 nm corresponds to the ligand Hbdq.

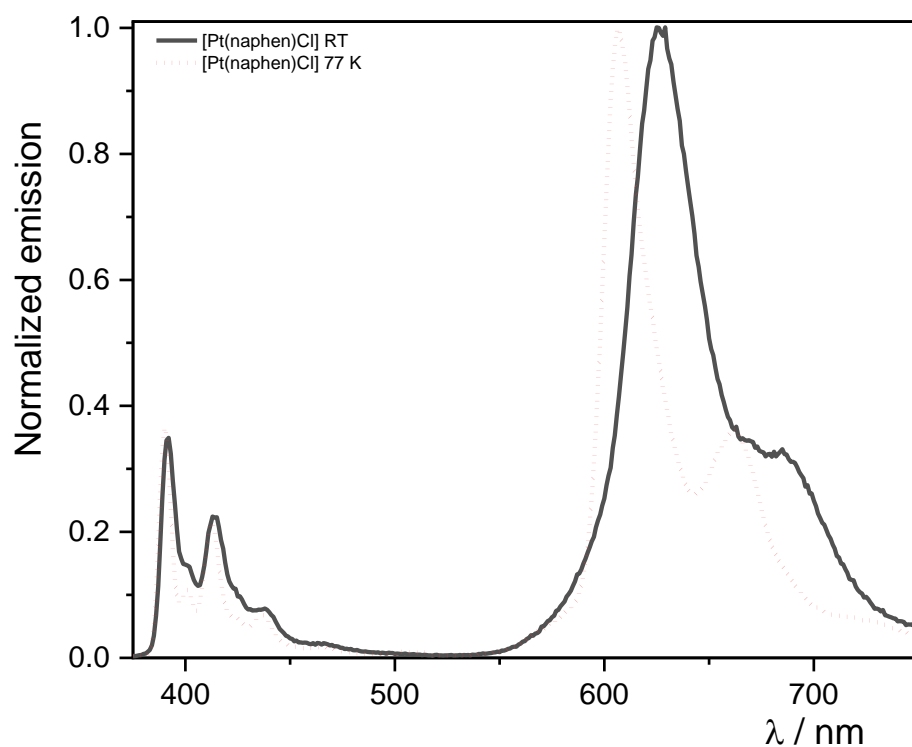

**Figure S25.** Normalised emission spectra of [Pt(naphen)Cl] in a  $\text{CH}_2\text{Cl}_2$  solution at RT (black solid line) and in a frozen glassy matrix of  $\text{CH}_2\text{Cl}_2$ :MeOH 1:1 at 77 K (red dotted line).  $\lambda_{\text{ex}} = 350$  nm. The emission at around 400 nm corresponds to the ligand Hnaphen.

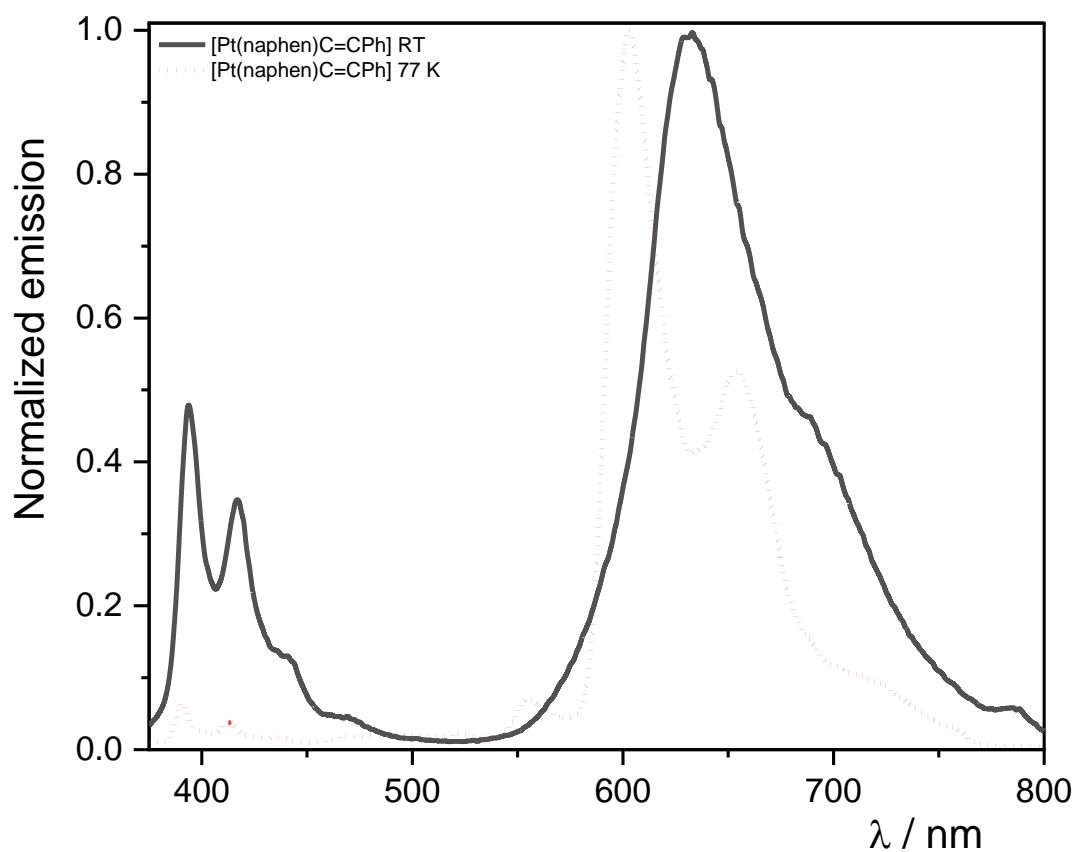

**Figure S26.** Normalised emission spectra of [Pt(naphen)C≡CPh] in a  $\text{CH}_2\text{Cl}_2$  solution at RT (black solid line) and in a frozen glassy matrix of  $\text{CH}_2\text{Cl}_2$ :MeOH 1:1 at 77 K (red dotted line).  $\lambda_{\text{ex}} = 350$  nm. The emission at around 400 nm corresponds to the ligand Hnaphen.

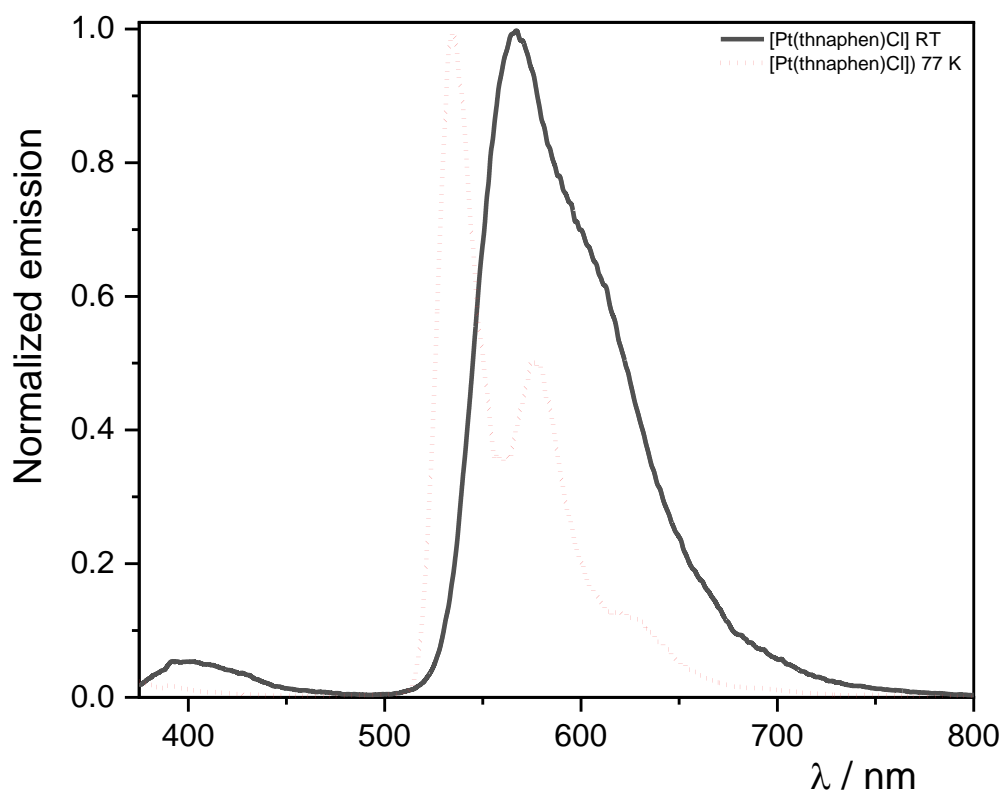

**Figure S27.** Normalised emission spectra of [Pt(thnaphen)Cl] in a  $\text{CH}_2\text{Cl}_2$  solution at RT (black solid line) and in a frozen glassy matrix of  $\text{CH}_2\text{Cl}_2:\text{MeOH}$  1:1 at 77 K (red dotted line).  $\lambda_{\text{ex}} = 350$  nm. The emission at around 400 nm corresponds to the ligand Hthnaphen.

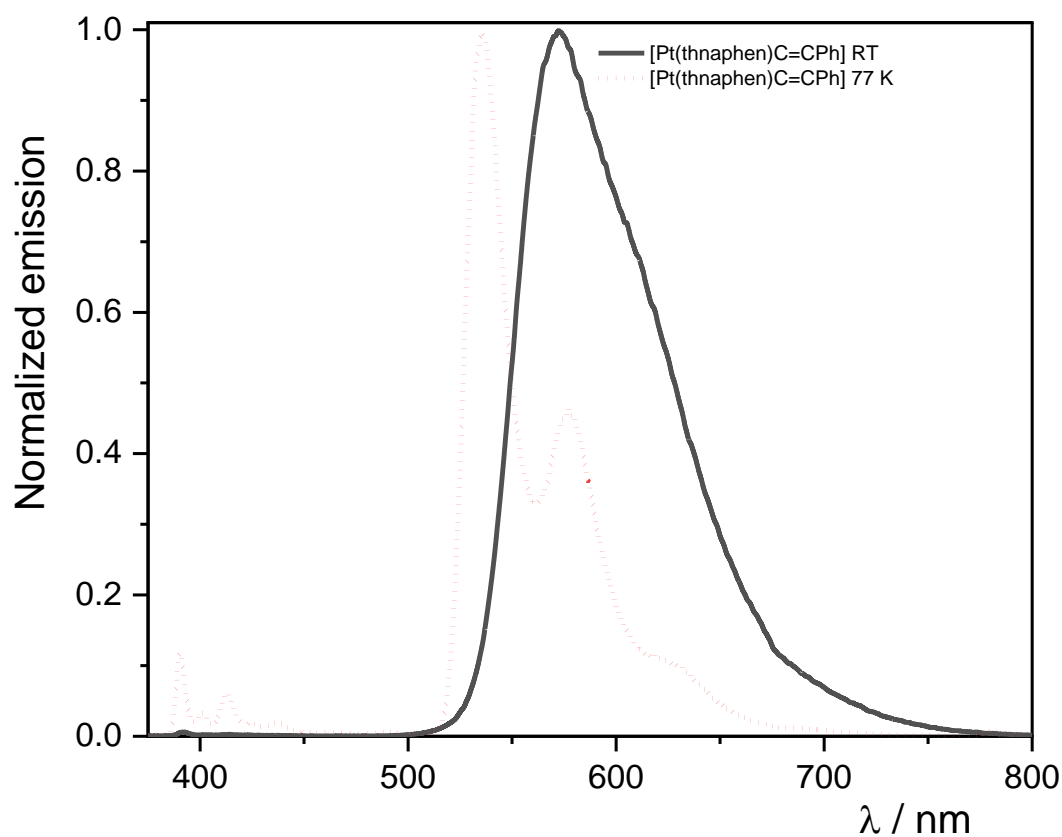

**Figure S28.** Normalised emission spectra of [Pt(thnaphen)C≡CPh] in a  $\text{CH}_2\text{Cl}_2$  solution at RT (black solid line) and in a frozen glassy matrix of  $\text{CH}_2\text{Cl}_2:\text{MeOH}$  1:1 at 77 K (red dotted line).  $\lambda_{\text{ex}} = 350$  nm. The emission at around 400 nm corresponds to the ligand Hthnaphen.

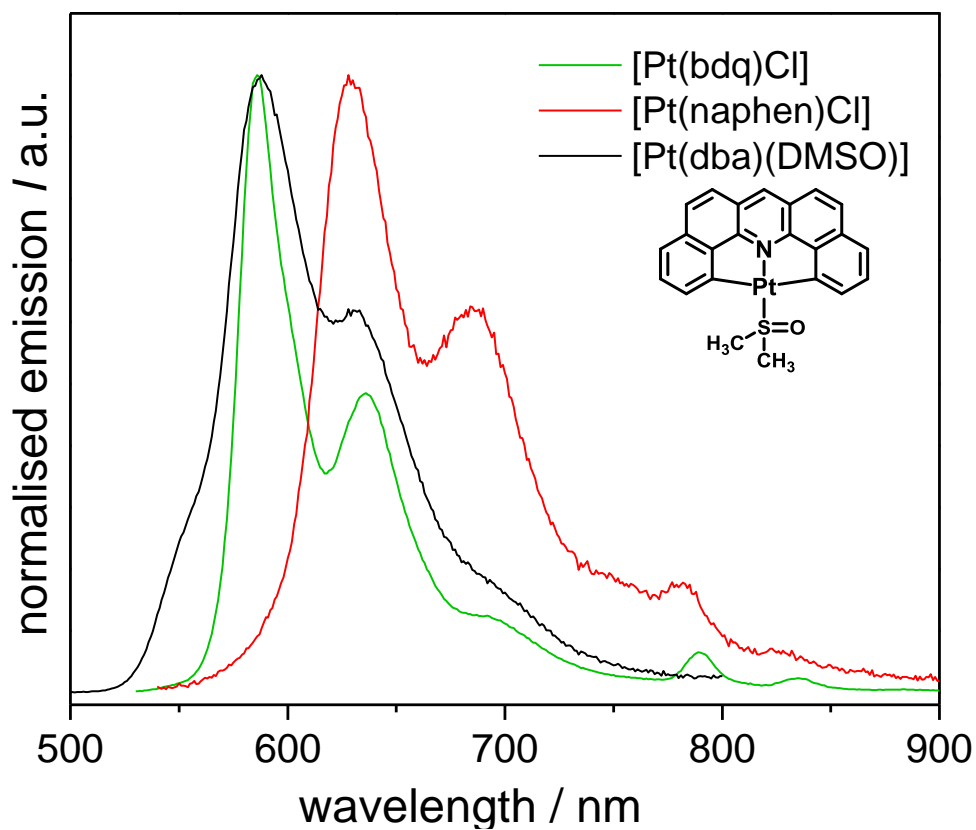

**Figure S29.** Normalised emission spectra of [Pt(bdq)Cl], [Pt(naphen)Cl], and [Pt(dba)(DMSO)][1] in  $\text{CH}_2\text{Cl}_2$  (298 K) ( $\lambda_{\text{exc}} = 350 \text{ nm}$ ).

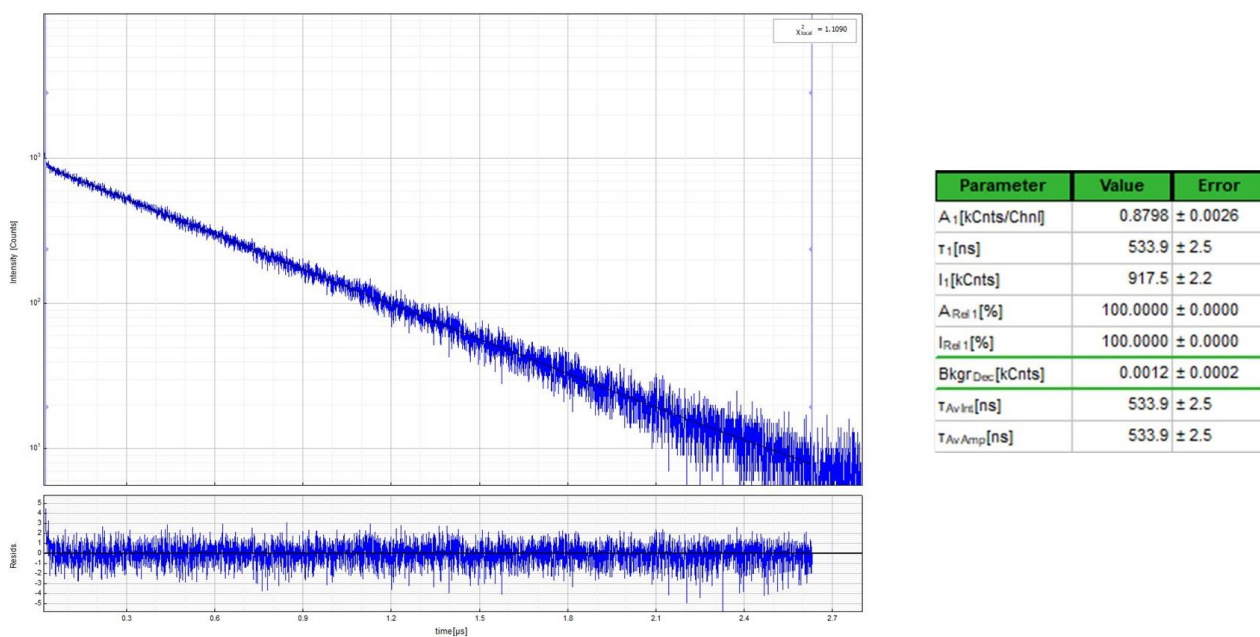

**Figure S30.** Left: Time-resolved photoluminescence decay of [Pt(bdq)Cl] in an air-equilibrated  $\text{CH}_2\text{Cl}_2$  solution at 298 K ( $c = 10^{-5} \text{ M}$ ), including the residuals ( $\lambda_{\text{ex}} = 376 \text{ nm}$ ,  $\lambda_{\text{em}} = 590 \text{ nm}$ ). Right: Fitting parameters including pre-exponential factors and confidence limits.

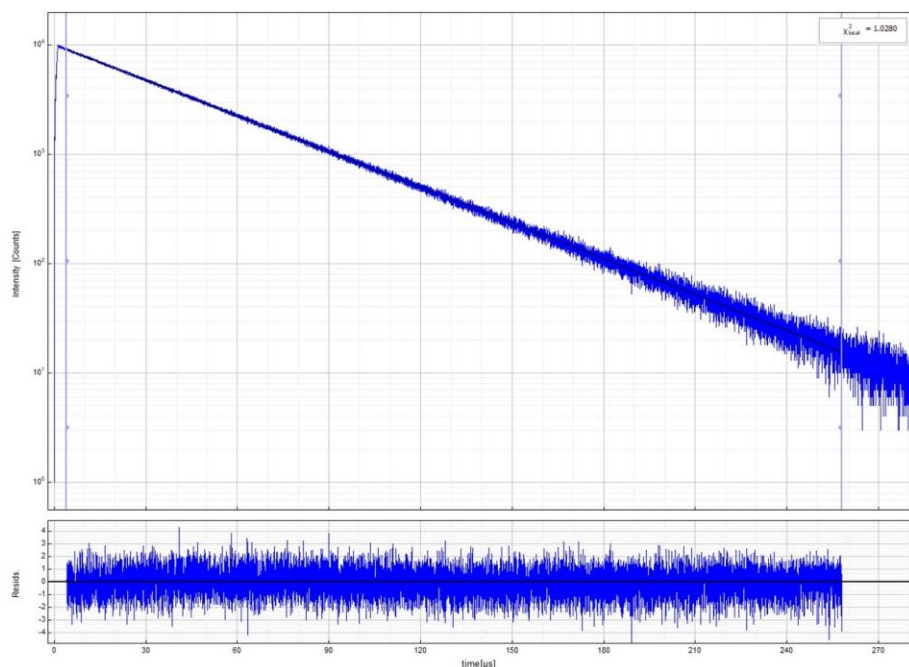

| Parameter             | Value    | Error        |
|-----------------------|----------|--------------|
| $A_1$ [kCnts/Chn]     | 9.0783   | $\pm 0.0075$ |
| $\tau_1$ [ns]         | 39928    | $\pm 27$     |
| $I_1$ [kCnts]         | 22654.7  | $\pm 8.0$    |
| $A_{Rel\ 1}$ [%]      | 100.0000 | $\pm 0.0000$ |
| $I_{Rel\ 1}$ [%]      | 100.0000 | $\pm 0.0000$ |
| $Bkgr_{Dec}$ [kCnts]  | -0.0002  | $\pm 0.0002$ |
| $\tau_{Av\ Int}$ [ns] | 39928    | $\pm 27$     |
| $\tau_{Av\ Amp}$ [ns] | 39928    | $\pm 27$     |

**Figure S31.** Left: Time-resolved photoluminescence decay of [Pt(bdq)Cl] in an Ar-purged CH<sub>2</sub>Cl<sub>2</sub> solution at 298 K ( $c = 10^{-5}$  M), including the residuals ( $\lambda_{ex} = 376$  nm,  $\lambda_{em} = 590$  nm). Right: Fitting parameters including pre-exponential factors and confidence limits.

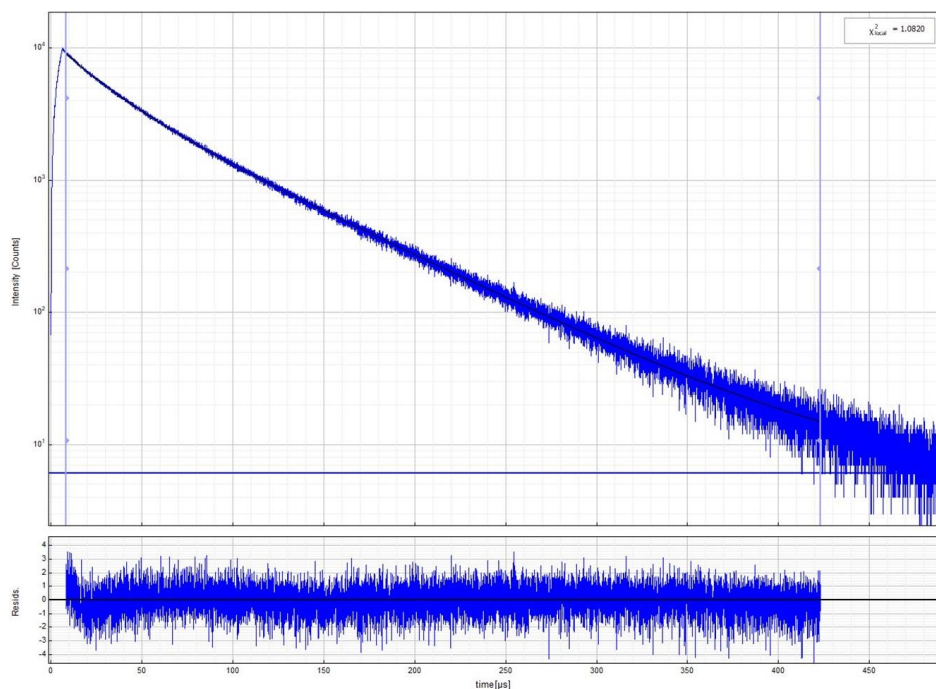

| Parameter             | Value  | Error        |
|-----------------------|--------|--------------|
| $A_1$ [kCnts/Chn]     | 4.958  | $\pm 0.046$  |
| $\tau_1$ [ns]         | 65584  | $\pm 248$    |
| $I_1$ [kCnts]         | 10162  | $\pm 56$     |
| $A_{Rel\ 1}$ [%]      | 54.87  | $\pm 0.46$   |
| $I_{Rel\ 1}$ [%]      | 77.12  | $\pm 0.49$   |
| $A_2$ [kCnts/Chn]     | 4.078  | $\pm 0.038$  |
| $\tau_2$ [ns]         | 23650  | $\pm 295$    |
| $I_2$ [kCnts]         | 3014   | $\pm 66$     |
| $A_{Rel\ 2}$ [%]      | 45.13  | $\pm 0.46$   |
| $I_{Rel\ 2}$ [%]      | 22.88  | $\pm 0.49$   |
| $Bkgr_{Dec}$ [kCnts]  | 0.0061 | $\pm 0.0003$ |
| $\tau_{Av\ Int}$ [ns] | 55992  | $\pm 57$     |
| $\tau_{Av\ Amp}$ [ns] | 46659  | $\pm 77$     |

**Figure S32.** Left: Time-resolved photoluminescence decay of [Pt(bdq)Cl] in a frozen CH<sub>2</sub>Cl<sub>2</sub>:MeOH 1:1 glassy matrix at 77 K ( $c = 10^{-5}$  M), including the residuals ( $\lambda_{ex} = 376$  nm,  $\lambda_{em} = 590$  nm). Right: Fitting parameters including pre-exponential factors and confidence limits.



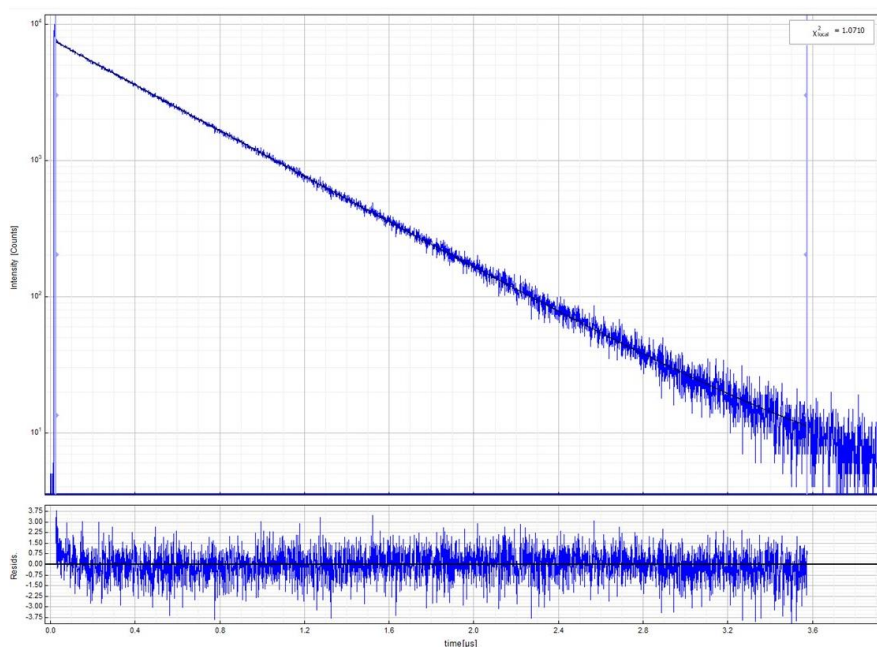

| Parameter            | Value             | Error |
|----------------------|-------------------|-------|
| $A_1$ [kCnts/Chnl]   | 7.379 ± 0.015     |       |
| $\tau_1$ [ns]        | 516.90 ± 0.95     |       |
| $I_1$ [kCnts]        | 3814.0 ± 3.2      |       |
| $A_{Rel\ 1}$ [%]     | 100.0000 ± 0.0000 |       |
| $I_{Rel\ 1}$ [%]     | 100.0000 ± 0.0000 |       |
| $Bkgr_{Dec}$ [kCnts] | 0.0035 ± 0.0003   |       |
| $\tau_{AvInt}$ [ns]  | 516.90 ± 0.95     |       |
| $\tau_{AvAmp}$ [ns]  | 516.90 ± 0.95     |       |

**Figure S33.** Left: Time-resolved photoluminescence decay of [Pt(naphen)Cl] in an air-equilibrated CH<sub>2</sub>Cl<sub>2</sub> solution at 298 K ( $c = 10^{-5}$  M), including the residuals ( $\lambda_{ex} = 376$  nm,  $\lambda_{em} = 640$  nm). Right: Fitting parameters including pre-exponential factors and confidence limits.

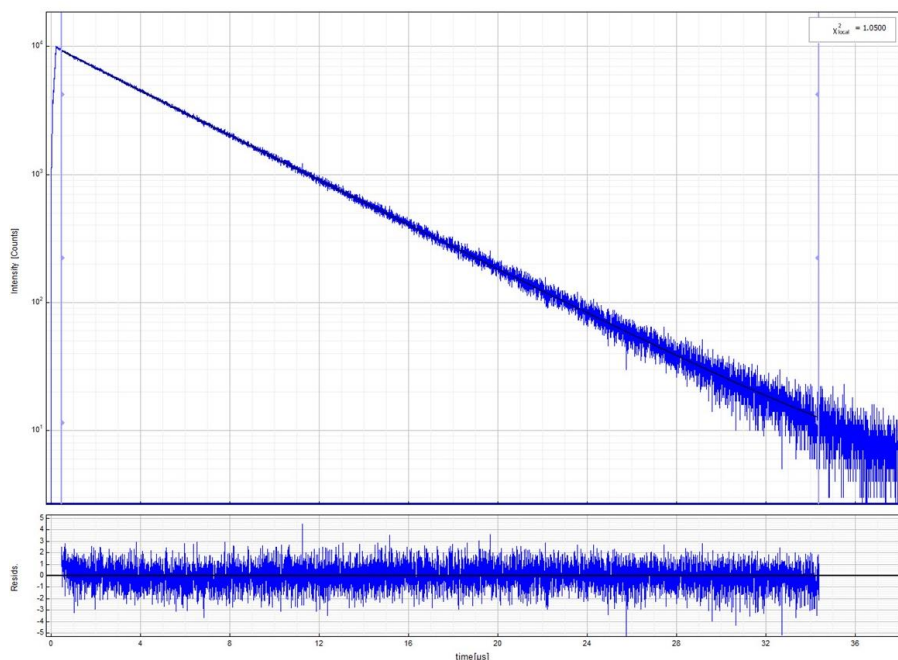

| Parameter            | Value             | Error |
|----------------------|-------------------|-------|
| $A_1$ [kCnts/Chnl]   | 9.2214 ± 0.0065   |       |
| $\tau_1$ [ns]        | 4955.3 ± 2.1      |       |
| $I_1$ [kCnts]        | 11423.8 ± 6.9     |       |
| $A_{Rel\ 1}$ [%]     | 100.0000 ± 0.0000 |       |
| $I_{Rel\ 1}$ [%]     | 100.0000 ± 0.0000 |       |
| $Bkgr_{Dec}$ [kCnts] | 0.0027 ± 0.0003   |       |
| $\tau_{AvInt}$ [ns]  | 4955.3 ± 2.1      |       |
| $\tau_{AvAmp}$ [ns]  | 4955.3 ± 2.1      |       |

**Figure S34.** Left: Time-resolved photoluminescence decay of [Pt(naphen)Cl] in an Ar-purged CH<sub>2</sub>Cl<sub>2</sub> solution at 298 K ( $c = 10^{-5}$  M), including the residuals ( $\lambda_{ex} = 376$  nm,  $\lambda_{em} = 640$  nm). Right: Fitting parameters including pre-exponential factors and confidence limits.



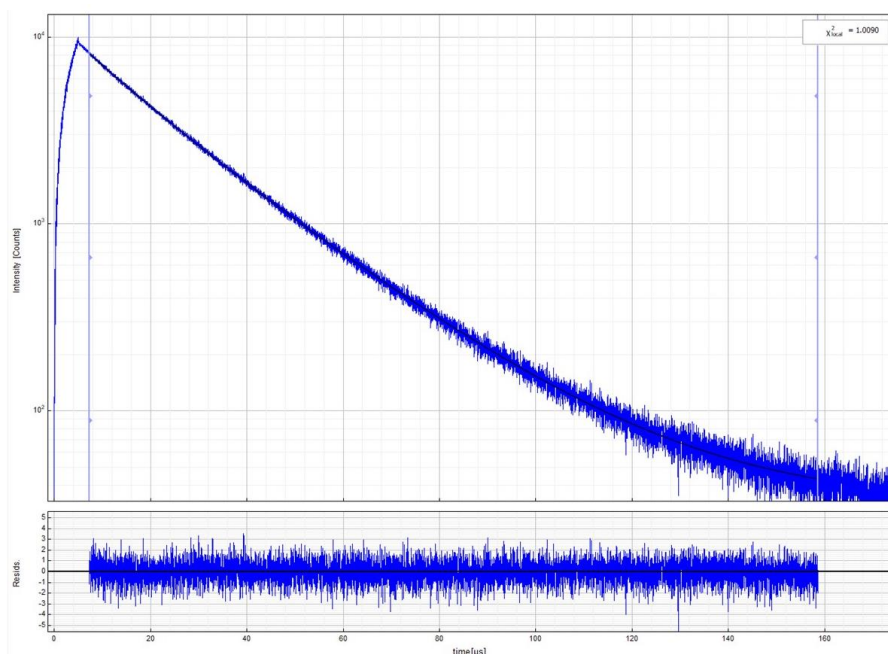

| Parameter                   | Value               | Error |
|-----------------------------|---------------------|-------|
| $A_1$ [kCnts/Chnl]          | $5.05 \pm 0.47$     |       |
| $\tau_1$ [ns]               | $24633 \pm 590$     |       |
| $I_1$ [kCnts]               | $7777 \pm 541$      |       |
| $A_{Rel\ 1}$ [%]            | $62.6 \pm 5.7$      |       |
| $I_{Rel\ 1}$ [%]            | $75.0 \pm 5.4$      |       |
| $A_2$ [kCnts/Chnl]          | $3.01 \pm 0.46$     |       |
| $\tau_2$ [ns]               | $13763 \pm 759$     |       |
| $I_2$ [kCnts]               | $2591 \pm 558$      |       |
| $A_{Rel\ 2}$ [%]            | $37.4 \pm 5.7$      |       |
| $I_{Rel\ 2}$ [%]            | $25.0 \pm 5.4$      |       |
| Bkgr <sub>Dec</sub> [kCnts] | $0.0323 \pm 0.0012$ |       |
| $\tau_{Av\ Int}$ [ns]       | $21916 \pm 68$      |       |
| $\tau_{Av\ Amp}$ [ns]       | $20572 \pm 50$      |       |

**Figure S35.** Left: Time-resolved photoluminescence decay of [Pt(naphen)Cl] in a frozen CH<sub>2</sub>Cl<sub>2</sub>:MeOH 1:1 glassy matrix at 77 K ( $c = 10^{-5}$  M), including the residuals ( $\lambda_{ex} = 376$  nm,  $\lambda_{em} = 620$  nm). Right: Fitting parameters including pre-exponential factors and confidence limits.

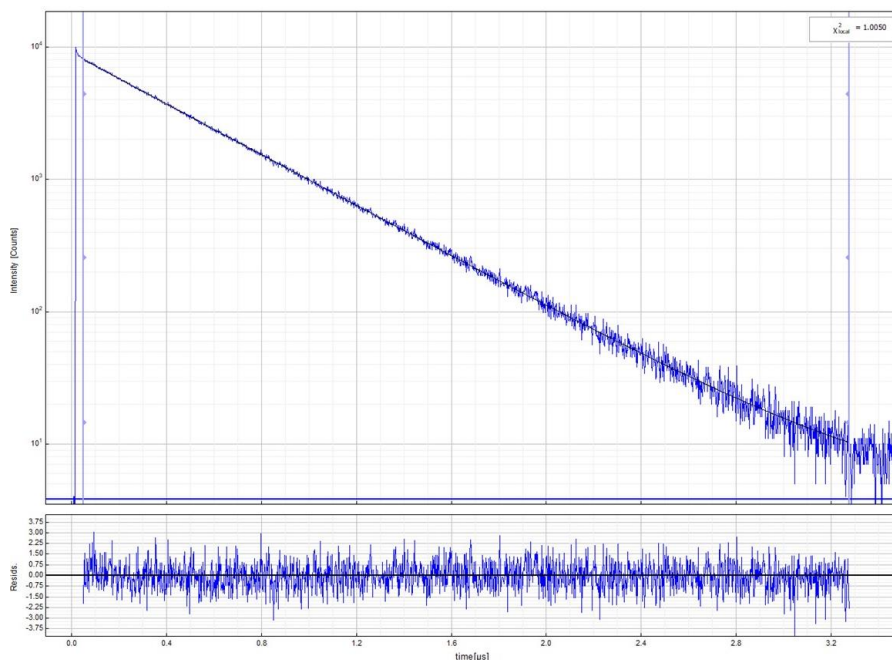

| Parameter                   | Value                 | Error |
|-----------------------------|-----------------------|-------|
| $A_1$ [kCnts/Chnl]          | $8.046 \pm 0.011$     |       |
| $\tau_1$ [ns]               | $452.56 \pm 0.91$     |       |
| $I_1$ [kCnts]               | $1820.6 \pm 2.7$      |       |
| $A_{Rel\ 1}$ [%]            | $100.0000 \pm 0.0000$ |       |
| $I_{Rel\ 1}$ [%]            | $100.0000 \pm 0.0000$ |       |
| Bkgr <sub>Dec</sub> [kCnts] | $0.0038 \pm 0.0005$   |       |
| $\tau_{Av\ Int}$ [ns]       | $452.56 \pm 0.91$     |       |
| $\tau_{Av\ Amp}$ [ns]       | $452.56 \pm 0.91$     |       |

**Figure S36.** Left: Time-resolved photoluminescence decay of [Pt(naphen)C≡CPh] in an air-equilibrated CH<sub>2</sub>Cl<sub>2</sub> solution at 298 K ( $c = 10^{-5}$  M), including the residuals ( $\lambda_{ex} = 376$  nm,  $\lambda_{em} = 650$  nm). Right: Fitting parameters including pre-exponential factors and confidence limits.

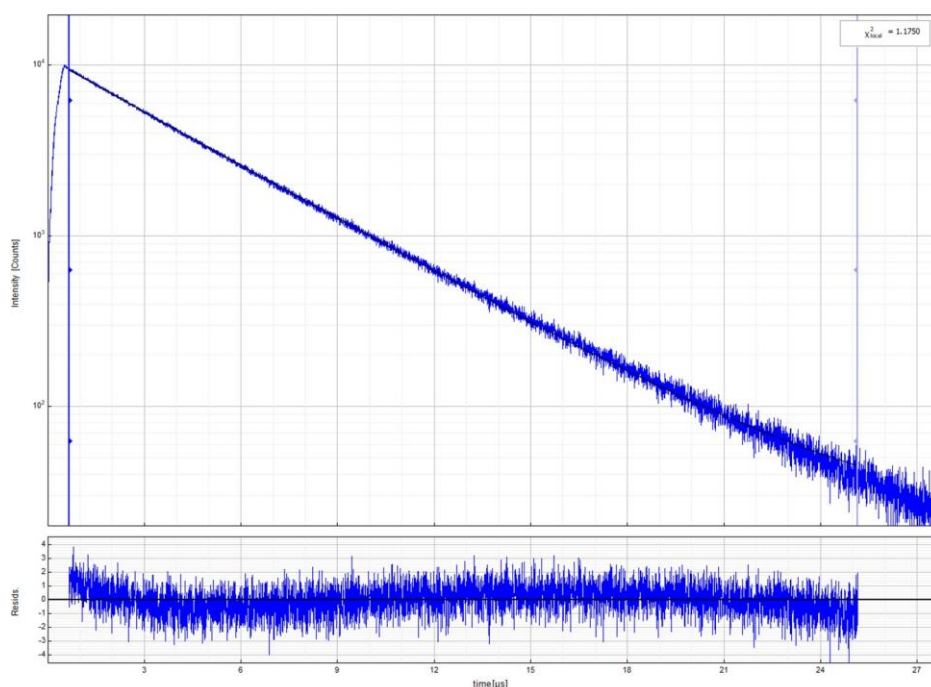

| Parameter              | Value             | Error |
|------------------------|-------------------|-------|
| $A_1$ [kCnts/Chnl]     | 9.317 ± 0.012     |       |
| $\tau_1$ [ns]          | 4146.4 ± 3.1      |       |
| $I_1$ [kCnts]          | 9657.7 ± 8.4      |       |
| $A_{Rel\ 1}$ [%]       | 100.0000 ± 0.0000 |       |
| $I_{Rel\ 1}$ [%]       | 100.0000 ± 0.0000 |       |
| $Bkgr_{Doc}$ [kCnts]   | 0.0195 ± 0.0005   |       |
| $\tau_{Av\ line}$ [ns] | 4146.4 ± 3.1      |       |
| $\tau_{Av\ Amp}$ [ns]  | 4146.4 ± 3.1      |       |

**Figure S37.** Left: Time-resolved photoluminescence decay of [Pt(naphen)C≡CPh] in an Ar-purged CH<sub>2</sub>Cl<sub>2</sub> solution at 298 K ( $c = 10^{-5}$  M), including the residuals ( $\lambda_{ex} = 376$  nm,  $\lambda_{em} = 650$  nm). Right: Fitting parameters including pre-exponential factors and confidence limits.

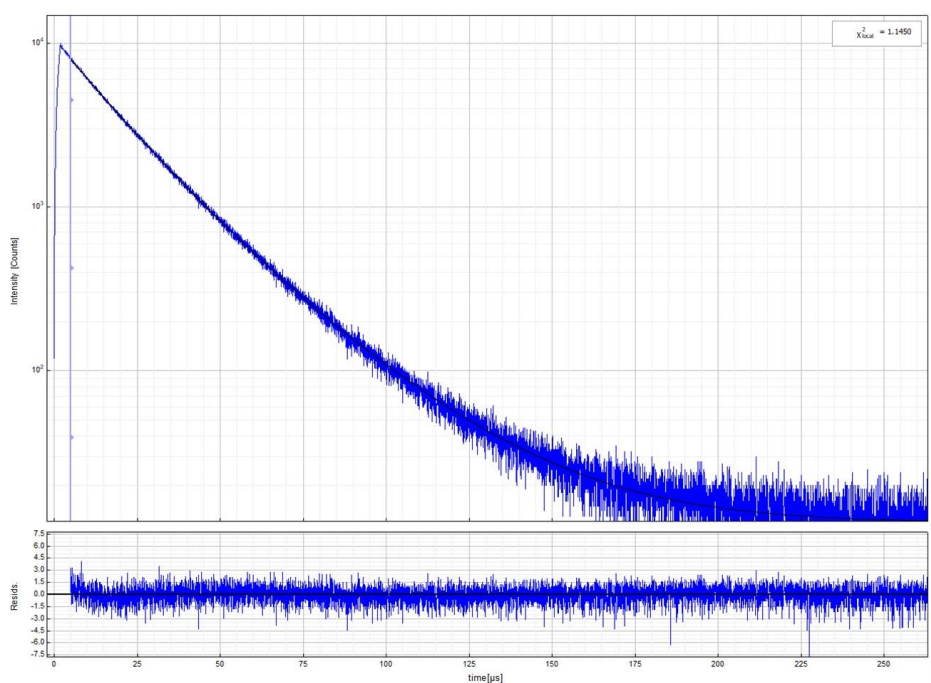

| Parameter              | Value           | Error |
|------------------------|-----------------|-------|
| $A_1$ [kCnts/Chnl]     | 1.93 ± 0.15     |       |
| $\tau_1$ [ns]          | 29775 ± 503     |       |
| $I_1$ [kCnts]          | 1799 ± 103      |       |
| $A_{Rel\ 1}$ [%]       | 24.3 ± 1.8      |       |
| $I_{Rel\ 1}$ [%]       | 36.9 ± 2.1      |       |
| $A_2$ [kCnts/Chnl]     | 6.02 ± 0.14     |       |
| $\tau_2$ [ns]          | 16378 ± 188     |       |
| $I_2$ [kCnts]          | 3080 ± 102      |       |
| $A_{Rel\ 2}$ [%]       | 75.7 ± 1.8      |       |
| $I_{Rel\ 2}$ [%]       | 63.1 ± 2.1      |       |
| $Bkgr_{Doc}$ [kCnts]   | 0.0118 ± 0.0001 |       |
| $\tau_{Av\ line}$ [ns] | 21318 ± 30      |       |
| $\tau_{Av\ Amp}$ [ns]  | 19636 ± 28      |       |

**Figure S38.** Left: Time-resolved photoluminescence decay of [Pt(naphen)C≡CPh] in a frozen CH<sub>2</sub>Cl<sub>2</sub>:MeOH 1:1 glassy matrix at 77 K ( $c = 10^{-5}$  M), including the residuals ( $\lambda_{ex} = 376$  nm,  $\lambda_{em} = 610$  nm). Right: Fitting parameters including pre-exponential factors and confidence limits.

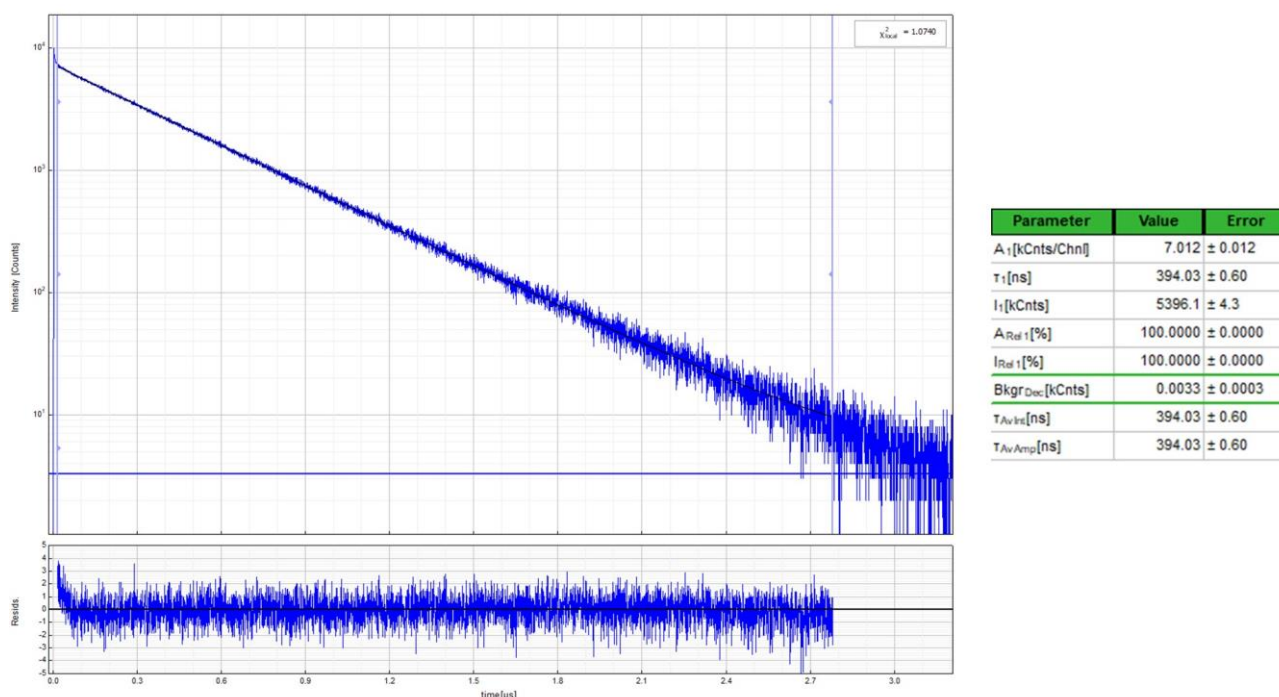

**Figure S39.** Left: Time-resolved photoluminescence decay of [Pt(thnaphen)Cl] in an air-equilibrated CH<sub>2</sub>Cl<sub>2</sub> solution at 298 K ( $c = 10^{-5}$  M), including the residuals ( $\lambda_{\text{ex}} = 376$  nm,  $\lambda_{\text{em}} = 590$  nm). Right: Fitting parameters including pre-exponential factors and confidence limits.

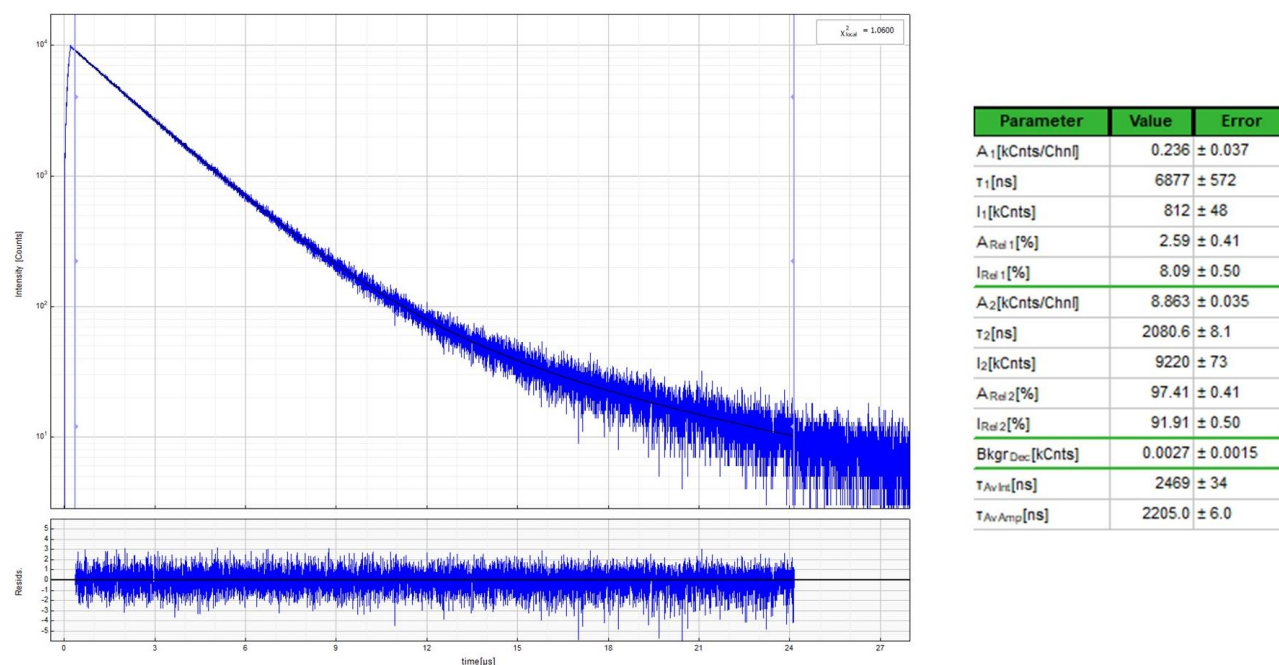

**Figure S40.** Left: Time-resolved photoluminescence decay of [Pt(naphen)C≡CPh] in an Ar-purged CH<sub>2</sub>Cl<sub>2</sub> solution at 298 K ( $c = 10^{-5}$  M), including the residuals ( $\lambda_{\text{ex}} = 376$  nm,  $\lambda_{\text{em}} = 590$  nm). Right: Fitting parameters including pre-exponential factors and confidence limits.

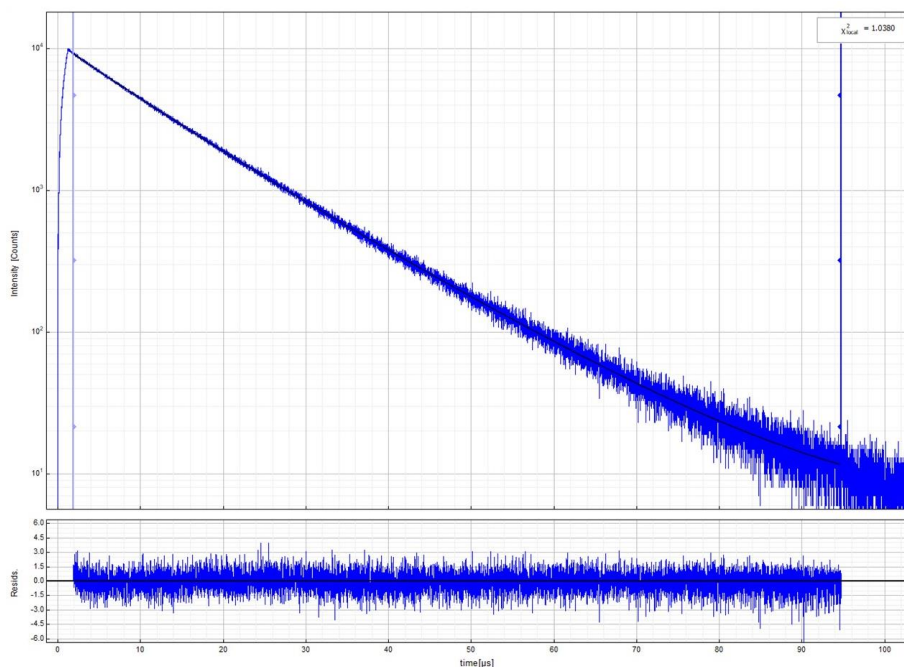

| Parameter             | Value           | Error |
|-----------------------|-----------------|-------|
| $A_1$ [kCnts/Chnl]    | 2.23 ± 0.24     |       |
| $\tau_1$ [ns]         | 16250 ± 334     |       |
| $I_1$ [kCnts]         | 4540 ± 395      |       |
| $A_{Rel\ 1}$ [%]      | 24.5 ± 2.6      |       |
| $I_{Rel\ 1}$ [%]      | 34.2 ± 3.0      |       |
| $A_2$ [kCnts/Chnl]    | 6.88 ± 0.23     |       |
| $\tau_2$ [ns]         | 10138 ± 119     |       |
| $I_2$ [kCnts]         | 8720 ± 387      |       |
| $A_{Rel\ 2}$ [%]      | 75.5 ± 2.6      |       |
| $I_{Rel\ 2}$ [%]      | 65.8 ± 3.0      |       |
| $Bkgr_{Dec}$ [kCnts]  | 0.0026 ± 0.0001 |       |
| $\tau_{Av\ Int}$ [ns] | 12231 ± 13      |       |
| $\tau_{Av\ Amp}$ [ns] | 11637 ± 14      |       |

**Figure S41.** Left: Time-resolved photoluminescence decay of [Pt(thnaphen)Cl] in a frozen CH<sub>2</sub>Cl<sub>2</sub>:MeOH 1:1 glassy matrix at 77 K ( $c = 10^{-5}$  M), including the residuals ( $\lambda_{ex} = 376$  nm,  $\lambda_{em} = 540$  nm). Right: Fitting parameters including pre-exponential factors and confidence limits.

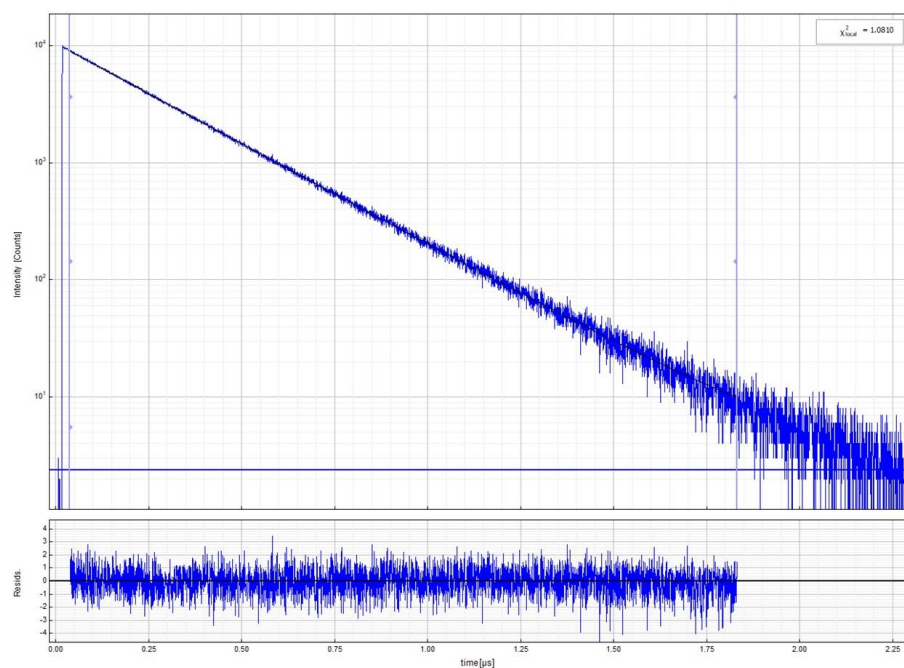

| Parameter             | Value             | Error |
|-----------------------|-------------------|-------|
| $A_1$ [kCnts/Chnl]    | 8.977 ± 0.012     |       |
| $\tau_1$ [ns]         | 253.23 ± 0.20     |       |
| $I_1$ [kCnts]         | 4546.6 ± 4.4      |       |
| $A_{Rel\ 1}$ [%]      | 100.0000 ± 0.0000 |       |
| $I_{Rel\ 1}$ [%]      | 100.0000 ± 0.0000 |       |
| $Bkgr_{Dec}$ [kCnts]  | 0.0024 ± 0.0002   |       |
| $\tau_{Av\ Int}$ [ns] | 253.23 ± 0.20     |       |
| $\tau_{Av\ Amp}$ [ns] | 253.23 ± 0.20     |       |

**Figure S42.** Left: Time-resolved photoluminescence decay of [Pt(thnaphen)C≡CPh] in an air-equilibrated CH<sub>2</sub>Cl<sub>2</sub> solution at 298 K ( $c = 10^{-5}$  M), including the residuals ( $\lambda_{ex} = 376$  nm,  $\lambda_{em} = 600$  nm). Right: Fitting parameters including pre-exponential factors and confidence limits.



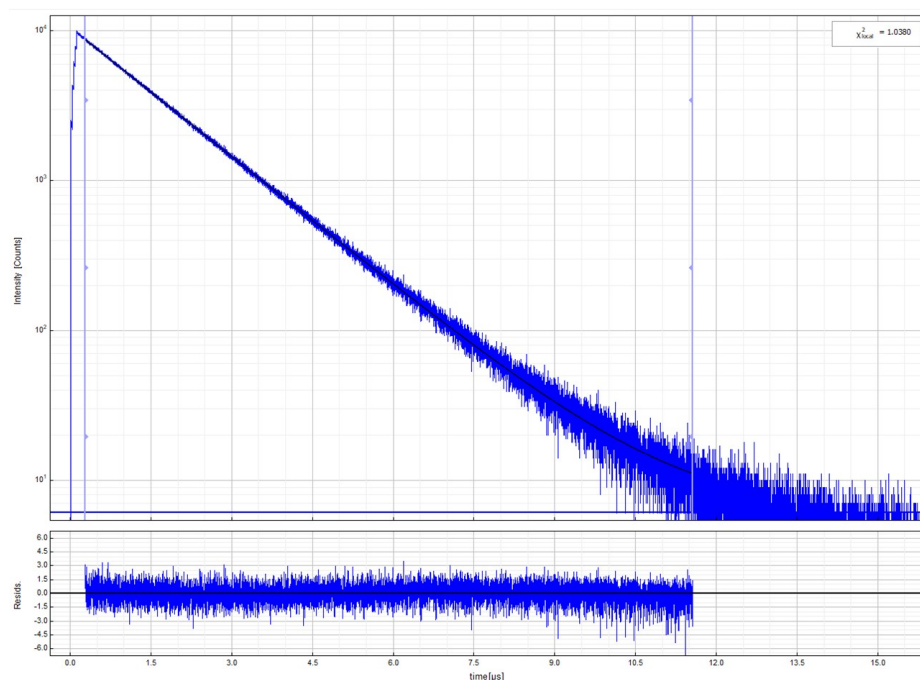

| Parameter                          | Value    | Error        |
|------------------------------------|----------|--------------|
| $A_1$ [kCnts/Chnl]                 | 8.7309   | $\pm 0.0068$ |
| $\tau_1$ [ns]                      | 1512.02  | $\pm 0.99$   |
| $I_1$ [kCnts]                      | 13201.4  | $\pm 7.7$    |
| $A_{\text{Rel } 1}$ [%]            | 100.0000 | $\pm 0.0000$ |
| $I_{\text{Rel } 1}$ [%]            | 100.0000 | $\pm 0.0000$ |
| $\text{Bkgr}_{\text{Dec}}$ [kCnts] | 0.0061   | $\pm 0.0002$ |
| $\tau_{\text{Av Int}}$ [ns]        | 1512.02  | $\pm 0.99$   |
| $\tau_{\text{Av Amp}}$ [ns]        | 1512.02  | $\pm 0.99$   |

**Figure S43.** Left: Time-resolved photoluminescence decay of [Pt(naphen)C≡CPh] in an Ar-purged CH<sub>2</sub>Cl<sub>2</sub> solution at 298 K ( $c = 10^{-5}$  M), including the residuals ( $\lambda_{\text{ex}} = 376$  nm,  $\lambda_{\text{em}} = 600$  nm). Right: Fitting parameters including pre-exponential factors and confidence limits.

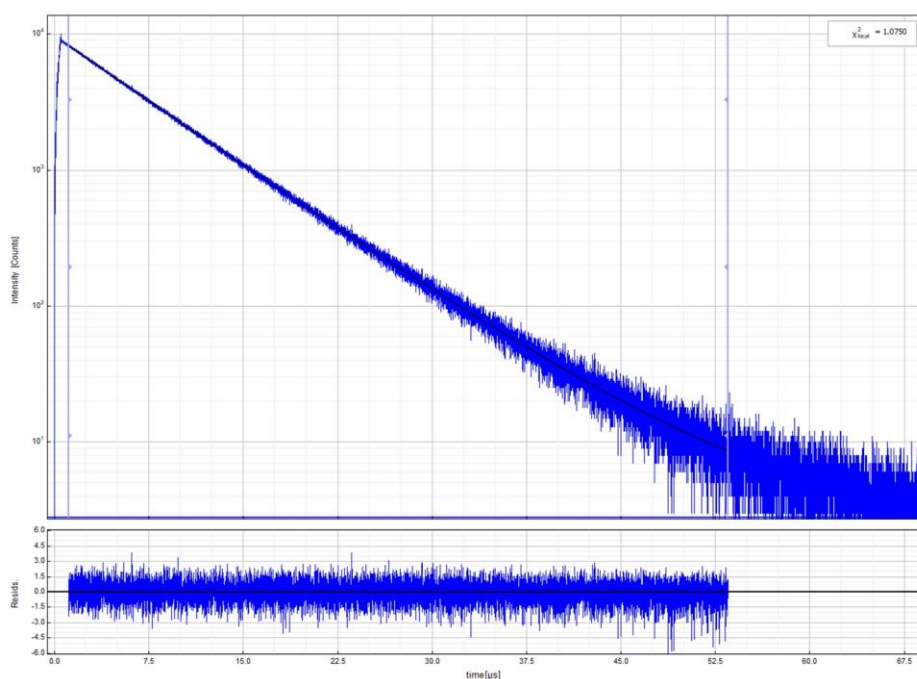

| Parameter                          | Value  | Error        |
|------------------------------------|--------|--------------|
| $A_1$ [kCnts/Chnl]                 | 1.096  | $\pm 0.018$  |
| $\tau_1$ [ns]                      | 9141   | $\pm 40$     |
| $I_1$ [kCnts]                      | 2505   | $\pm 33$     |
| $A_{\text{Rel } 1}$ [%]            | 13.36  | $\pm 0.22$   |
| $I_{\text{Rel } 1}$ [%]            | 17.81  | $\pm 0.24$   |
| $A_2$ [kCnts/Chnl]                 | 7.109  | $\pm 0.019$  |
| $\tau_2$ [ns]                      | 6505.1 | $\pm 5.8$    |
| $I_2$ [kCnts]                      | 11562  | $\pm 36$     |
| $A_{\text{Rel } 2}$ [%]            | 86.64  | $\pm 0.22$   |
| $I_{\text{Rel } 2}$ [%]            | 82.19  | $\pm 0.24$   |
| $\text{Bkgr}_{\text{Dec}}$ [kCnts] | 0.0028 | $\pm 0.0002$ |
| $\tau_{\text{Av Int}}$ [ns]        | 6974.6 | $\pm 3.2$    |
| $\tau_{\text{Av Amp}}$ [ns]        | 6857.3 | $\pm 2.2$    |

**Figure S44.** Left: Time-resolved photoluminescence decay of [Pt(thnaphen)C≡CPh] in a frozen CH<sub>2</sub>Cl<sub>2</sub>:MeOH 1:1 glassy matrix at 77 K ( $c = 10^{-5}$  M), including the residuals ( $\lambda_{\text{ex}} = 376$  nm,  $\lambda_{\text{em}} = 550$  nm). Right: Fitting parameters including pre-exponential factors and confidence limits.

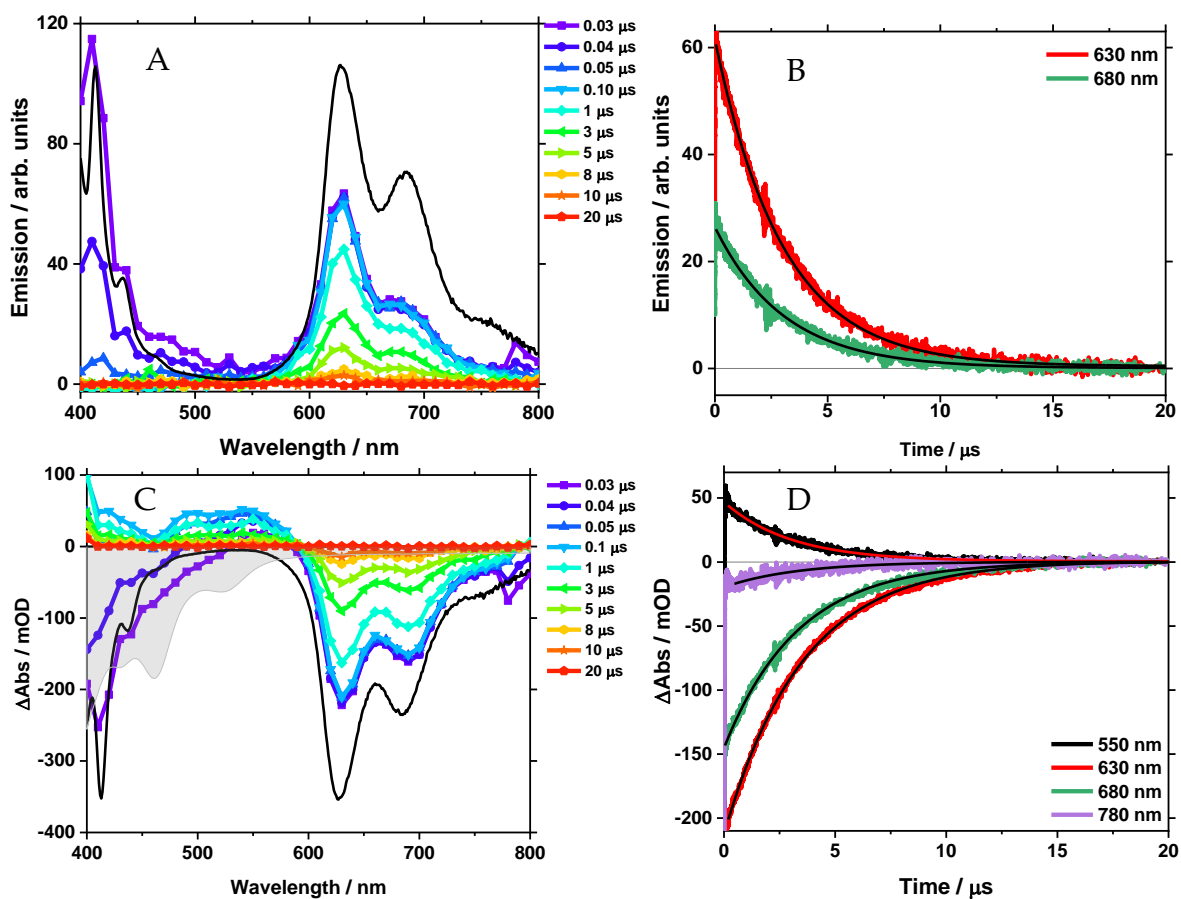

**Figure S45.** Left: Nanosecond time-resolved emission spectra superimposed to the inverted steady-state spectrum in black (A) and transient absorption spectra (B) of [Pt(naphen)Cl] in  $\text{CH}_2\text{Cl}_2$  at selected time points. Black/grey line refers to superimposed inverted steady state emission/absorption spectra respectively. Right: Decay fits at selected wavelengths. Please note: The figure presents data, which were recorded in the presence of trace amount of ligand. The residual free ligand in the sample leads to the short-lived emission band centered at 410 nm.

## Supporting Tables

**Table S1.** UV-vis absorptions of the ligands and [Pt(L)X] complexes <sup>a</sup>.

| [Pt(L)X]<br>L =                 | X              | $\lambda_1$ ( $\epsilon$ ) | $\lambda_2$ ( $\epsilon$ ) | $\lambda_3$ ( $\epsilon$ ) | $\lambda_4$ ( $\epsilon$ ) | $\lambda_5$ ( $\epsilon$ ) | $\lambda_6$ ( $\epsilon$ ) | $\lambda_7$ ( $\epsilon$ ) | $\lambda_8$ ( $\epsilon$ ) | $\lambda_9$ ( $\epsilon$ ) | $\lambda_{10}$ ( $\epsilon$ ) | cut-off<br>(nm) |
|---------------------------------|----------------|----------------------------|----------------------------|----------------------------|----------------------------|----------------------------|----------------------------|----------------------------|----------------------------|----------------------------|-------------------------------|-----------------|
| Hnaphen                         |                | 242<br>(1.25)              | 256<br>(1.17)              | 289sh<br>(2.09)            | 297<br>(2.48)              | 308<br>(1.80)              | 326<br>(0.49)              | 336sh<br>(0.42)            | 351<br>(0.29)              | 369<br>(0.26)              | 388<br>(0.27)                 |                 |
| Pt naphen                       | Cl             | 255<br>(21.8)              | 284<br>(18.2)              | 300<br>(24.7)              | 323<br>(9.1)               | 354<br>(6.0)               | 380<br>(5.3)               | 401<br>(3.4)               | 428<br>(2.6)               | 461<br>(2.7)               | 523<br>(0.9)                  | 600             |
| Pt naphen                       | C $\equiv$ CPh | 256<br>(28.7)              | 284<br>(24.0)              | 301<br>(26.8)              | 321<br>(9.8)               | 361<br>(5.1)               | 378<br>(11.2)              | 390<br>(5.1)               | 433<br>(2.5)               | 464<br>(3.3)               | 534<br>(1.2)                  | 606             |
| Hthnaphen                       |                | 241sh<br>(2.09)            | 247<br>(2.23)              | 285<br>(0.89)              | 295<br>(0.79)              | 330<br>(1.43)              | 338<br>(1.45)              | 352sh<br>(0.37)            |                            |                            |                               |                 |
| Pt<br>thnaphen                  | Cl             | 246<br>(17.7)              | 266<br>(16.9)              | 291<br>(20.0)              | 307<br>(16.1)              | 338<br>(11.9)              | 361<br>(10.4)              | 383<br>(9.8)               | 428<br>(2.3)               | 452<br>(1.0)               | 524<br>(0.1)                  | 563             |
| Pt<br>thnaphen                  | C $\equiv$ CPh | 252<br>(26.8)              | 286<br>(33.3)              | 304<br>(10.8)              | 346<br>(14.9)              | 357<br>(13.9)              | 381<br>(11.2)              | 387<br>(9.7)               | 430<br>(5.3)               | 451<br>(5.0)               | 533<br>(0.3)                  | 563             |
| Hbdq                            |                | 252<br>(2.33)              | 286sh<br>(2.93)            | 298<br>(5.56)              | 303sh<br>(4.23)            | 317sh<br>(1.18)            | 333<br>(0.73)              | 352<br>(0.36)              | 372<br>(0.45)              | 393<br>(0.67)              |                               |                 |
| Pt bdq                          | Cl             | 254<br>(25.0)              | 277<br>(25.5)              | 298<br>(20.4)              |                            | 324<br>(12.2)              | 360<br>(4.6)               | 384<br>(4.1)               | 433<br>(4.8)               | 461<br>(7.7)               | 493<br>(0.6)                  | 568             |
| H <sub>2</sub> dba <sup>b</sup> |                | 289<br>(63.3)              | 302<br>(57.0)              | 338<br>(8.6)               | 324<br>(8.3)               | 355<br>(6.5)               | 372<br>(9.0)               | 394<br>(13.5)              |                            |                            |                               |                 |
| Pt dba <sup>b</sup>             | dmso           | -                          | 296<br>(56.5)              | -                          | 327<br>(9.1)               | 341<br>(8.1)               | 386<br>(3.7)               | 409<br>(3.9)               | 461<br>(1.0)               | 498<br>(1.8)               | 529<br>(2.3)                  | 580             |

<sup>a</sup> Absorption maxima  $\lambda_{\text{abs}}$  in nm ( $\epsilon$  in  $10^3 \text{ M}^{-1} \text{ cm}^{-1}$ ) in  $\text{CH}_2\text{Cl}_2$  (298 K). <sup>b</sup> From Ref. [1], measured in THF.

## Reference

(1) S. Garbe, M. Krause, A. Klimpel, I. Neundorff, P. Lippmann, I. Ott, D. Brünkink, C. A. Strassert, N. L. Doltsinis, A. Klein, Cyclometalated Pt Complexes of CNC Pincer Ligands: Luminescence and Cytotoxic Evaluation. *Organometallics* **2020**, *39*, 746–756.
